# Supplementary material for: Characteristics of de novo structural changes in the human genome
Source: HighWire-hosted journal article supplement (doi:10.1101/gr.185041.114), 2015-04-16
Supplement: Supplemental_Material.docx [file Supplemental_Material.docx]

**Supplemental Material**

**Characteristics of *de novo* structural changes in the human genome**

Wigard P. Kloosterman1,18, Laurent C. Francioli1,18, Fereydoun Hormozdiari2, Tobias Marschall3, Jayne Y. Hehir-Kwa4, Abdel Abdellaoui5, Eric-Wubbo Lameijer6, Matthijs H. Moed6, Vyacheslav Koval7, Ivo Renkens1, Markus J. van Roosmalen1, Pascal Arp7, Lennart C. Karssen8, Bradley P. Coe2, Robert E. Handsaker9, Eka D. Suchiman6, Edwin Cuppen1, Djie T. Thung4, Mitch McVey10, Michael C. Wendl11,12, Genome of the Netherlands Consortium, Andre Uitterlinden7, Cornelia M. van Duijn8, Morris Swertz13,14, Cisca Wijmenga13,14, Gertjan van Ommen15, P. Eline Slagboom6, Dorret I. Boomsma5, Alexander Schönhuth3, Evan E. Eichler2, Paul I. W. de Bakker1,16, Kai Ye11,* and Victor Guryev17,*

1 Department of Medical Genetics, University Medical Center Utrecht, Utrecht, 3584CG, The Netherlands

2 Department of Genome Sciences, University of Washington, Seattle, 98105, USA

3 Life Sciences Group, Centrum voor Wiskunde en Informatica, Amsterdam, 1098XG, The Netherlands

4 Department of Human Genetics, Radboud University Medical Center, Nijmegen, 6525GA, The Netherlands.

5 Department of Biological Psychology, VU University Amsterdam, Amsterdam, 1081BT, The Netherlands

6 Department of Medical Statistics and Bioinformatics, Leiden University Medical Center, Leiden, 2300RC, The Netherlands

7 Department of Internal Medicine, Erasmus Medical Center, Rotterdam, 3000CA, The Netherlands

8 Department of Epidemiology, Erasmus Medical Center, Rotterdam, 3000CA, The Netherlands

9 Department of Genetics, Harvard Medical School, Boston, MA 02115, USA

10 Department of Biology, Tufts University, Medford, MA 02115, USA

11 The Genome Institute, Washington University, St. Louis, MO 63108, USA

12 Department of Mathematics, Washington University, St. Louis, MO 63108, USA

13 Department of Genetics, University of Groningen, University Medical Center Groningen, Groningen, 9700RB, The Netherlands

14 Genomics Coordination Center, University of Groningen, University Medical Center Groningen, Groningen, 9700RB, The Netherlands

15 Department of Human Genetics, Leiden University Medical Center, Leiden, 2300RC, The Netherlands

16 Department of Epidemiology, University Medical Center Utrecht, Utrecht, 3584CG, The Netherlands

17 European Research Institute for the Biology of Ageing, University of Groningen, University Medical Center Groningen, Groningen, 9713AD, The Netherlands

18 These authors contributed equally to this work

* Correspondence:

Kai Ye: The Genome Institute, Washington University School of Medicine, Campus Box 8501, 4444 Forest Park Ave, St. Louis, MO 63108, USA. Phone: +1 (314) 286-1800. Fax: +1 (314) 286-1810. E-mail: [kye@genome.wustl.edu](mailto:kye@genome.wustl.edu)

Victor Guryev: European Research Institute for the Biology of Ageing, University Medical Center Groningen, Antonius Deusinglaan 1, Building 3226, Int. Zip FA50, 9700AD, Groningen, The Netherlands. Phone: +31 (6) 5272 4873. Fax: +31 (50) 361 7300. Email: [v.guryev@umcg.nl](mailto:v.guryev@umcg.nl)

**Content**

I. Supplemental Figures 5

II. Supplemental Methods 8

1 Detection of *de novo* variants 8

1.1 GATK UnifiedGenotyper 8

1.2 GATK HaplotypeCaller 9

1.3 Pindel 9

1.4 1-2-3 SV 9

1.5 DWAC-seq 9

1.6 MATE-CLEVER 9

1.7 Genome STRiP 10

1.8 Mobster 10

1.9 *De novo* indel and SV detection sensitivity analysis 10

2 Breakpoint mapping and primer design 11

3 Validation experiments 11

3.1 Technologies 11

3.1.1 Sanger validation 11

3.1.2 Miseq validation 12

3.1.3 IonTorrent validation 12

3.2 *De novo* indel validation results 12

3.3 *De novo* SV validation results 12

3.3.1 Pilot validation of split-reads and discordant reads predictions 13

3.3.2 Large SVs / discordant pair and read depth approaches 13

3.3.3 Large SVs / read depth-based methods 13

3.3.4 Short SVs produced by MATE-CLEVER 13

3.3.5 Large scale validation 13

3.3.6 Mobile element insertions validation 13

3.3.7 Cross-validation using SNP array data 13

3.3.8 Precision of breakpoint prediction by SV calling tools 14

4 Indel classification 14

4.1 Formation mechanism 14

4.2 Frequency of indel categories 15

4.3 Comparison against inherited indels 15

5 *De novo* SV formation mechanisms 15

6 Genome context and functional effects 15

III. The Genome of the Netherlands consortium 16

IV. The LifeLines Cohort Study 17

V. Supplemental References 19

1. Supplemental Figures

**
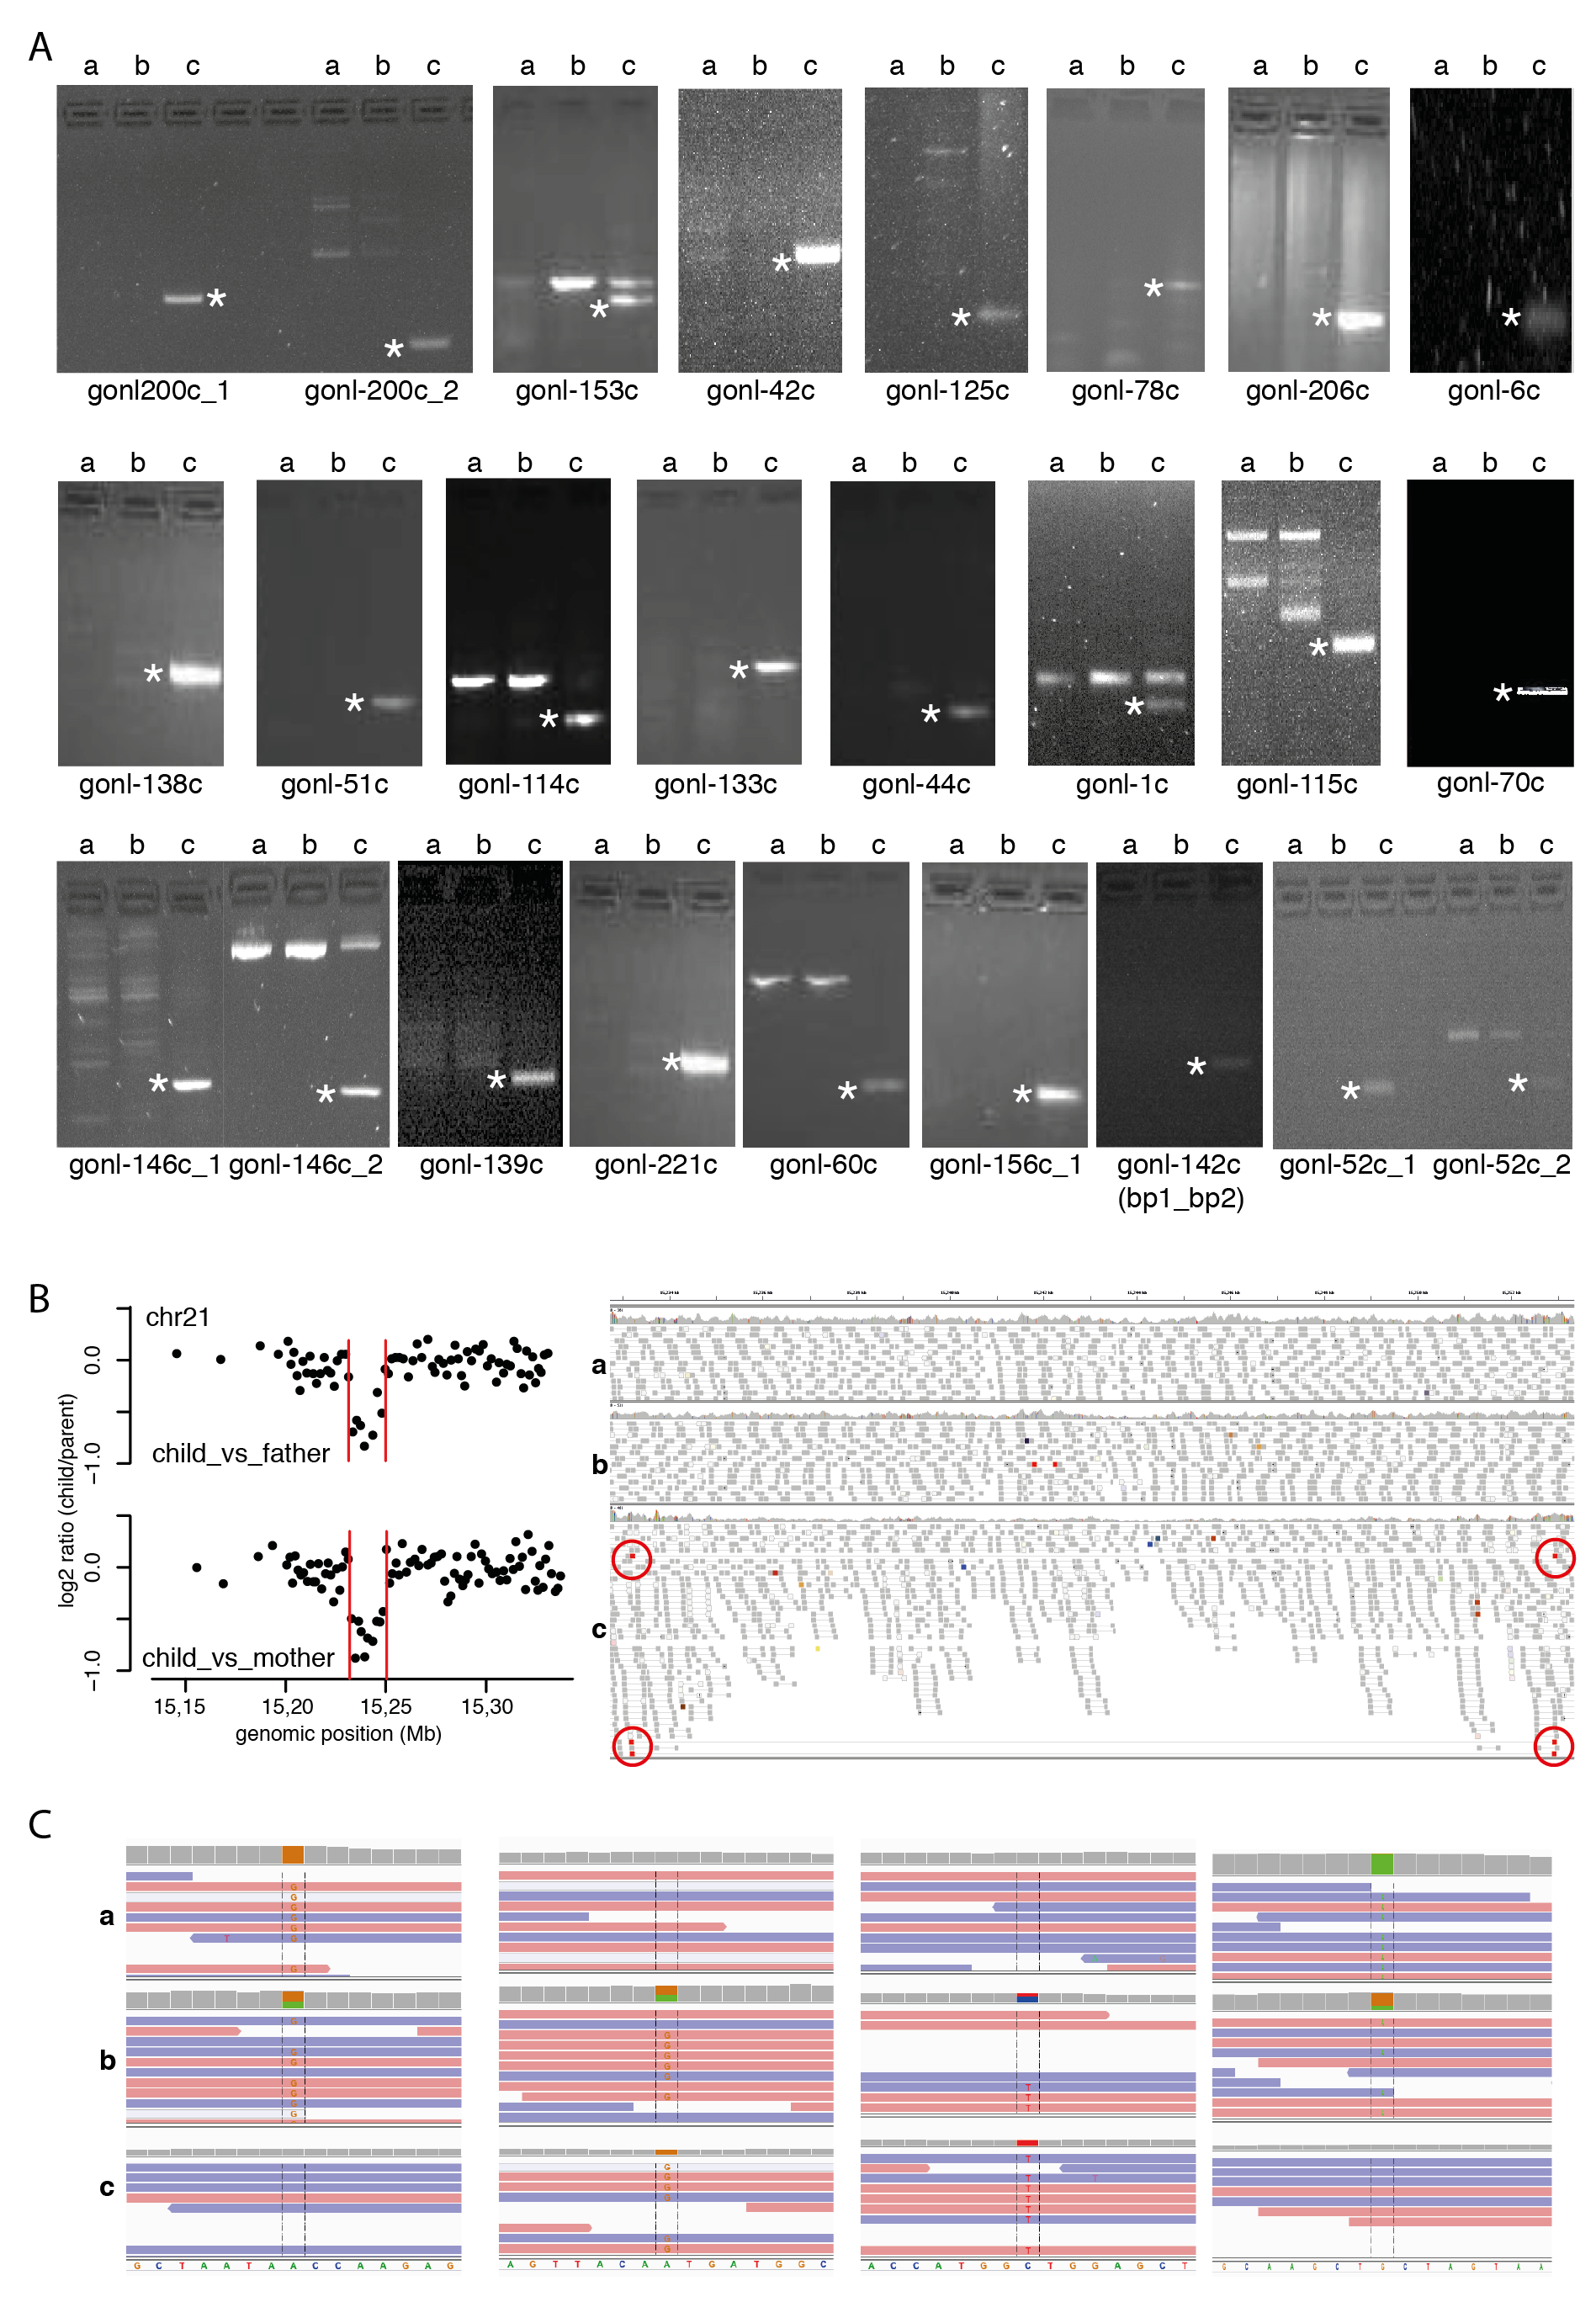
**

**Supplemental Figure 1. Overview of confirmatory PCR results for *de novo* SV breakpoints (> 100bp) identified in the GoNL dataset. (A)** Primer sets for *de novo* SV breakpoint junctions were tested on the father (a), mother (b) and child (c). For each breakpoint junction a unique PCR band is visible in the child. The PCR product was sequenced by Sanger sequencing to confirm the predicted SV breakpoint (*). **(B)** Coverage depth (left panel) and discordant read pair (right panel) support for a 19kb *de novo* deletion in gonl-156c. This *de novo* SV is overlapping with segmental duplications and could not be confirmed by PCR across the breakpoint junction. **(C)** Genotyping of informative SNP positions for family gonl-156 confirmed loss of heterozygosity in the child (c) for SNPs that fall within the boundaries of the 19kb *de novo* deletion shown in panel B. The informative SNPs unequivocally confirm the presence of the deletion on the paternal allele. Only the mother haplotype is retained in the child.


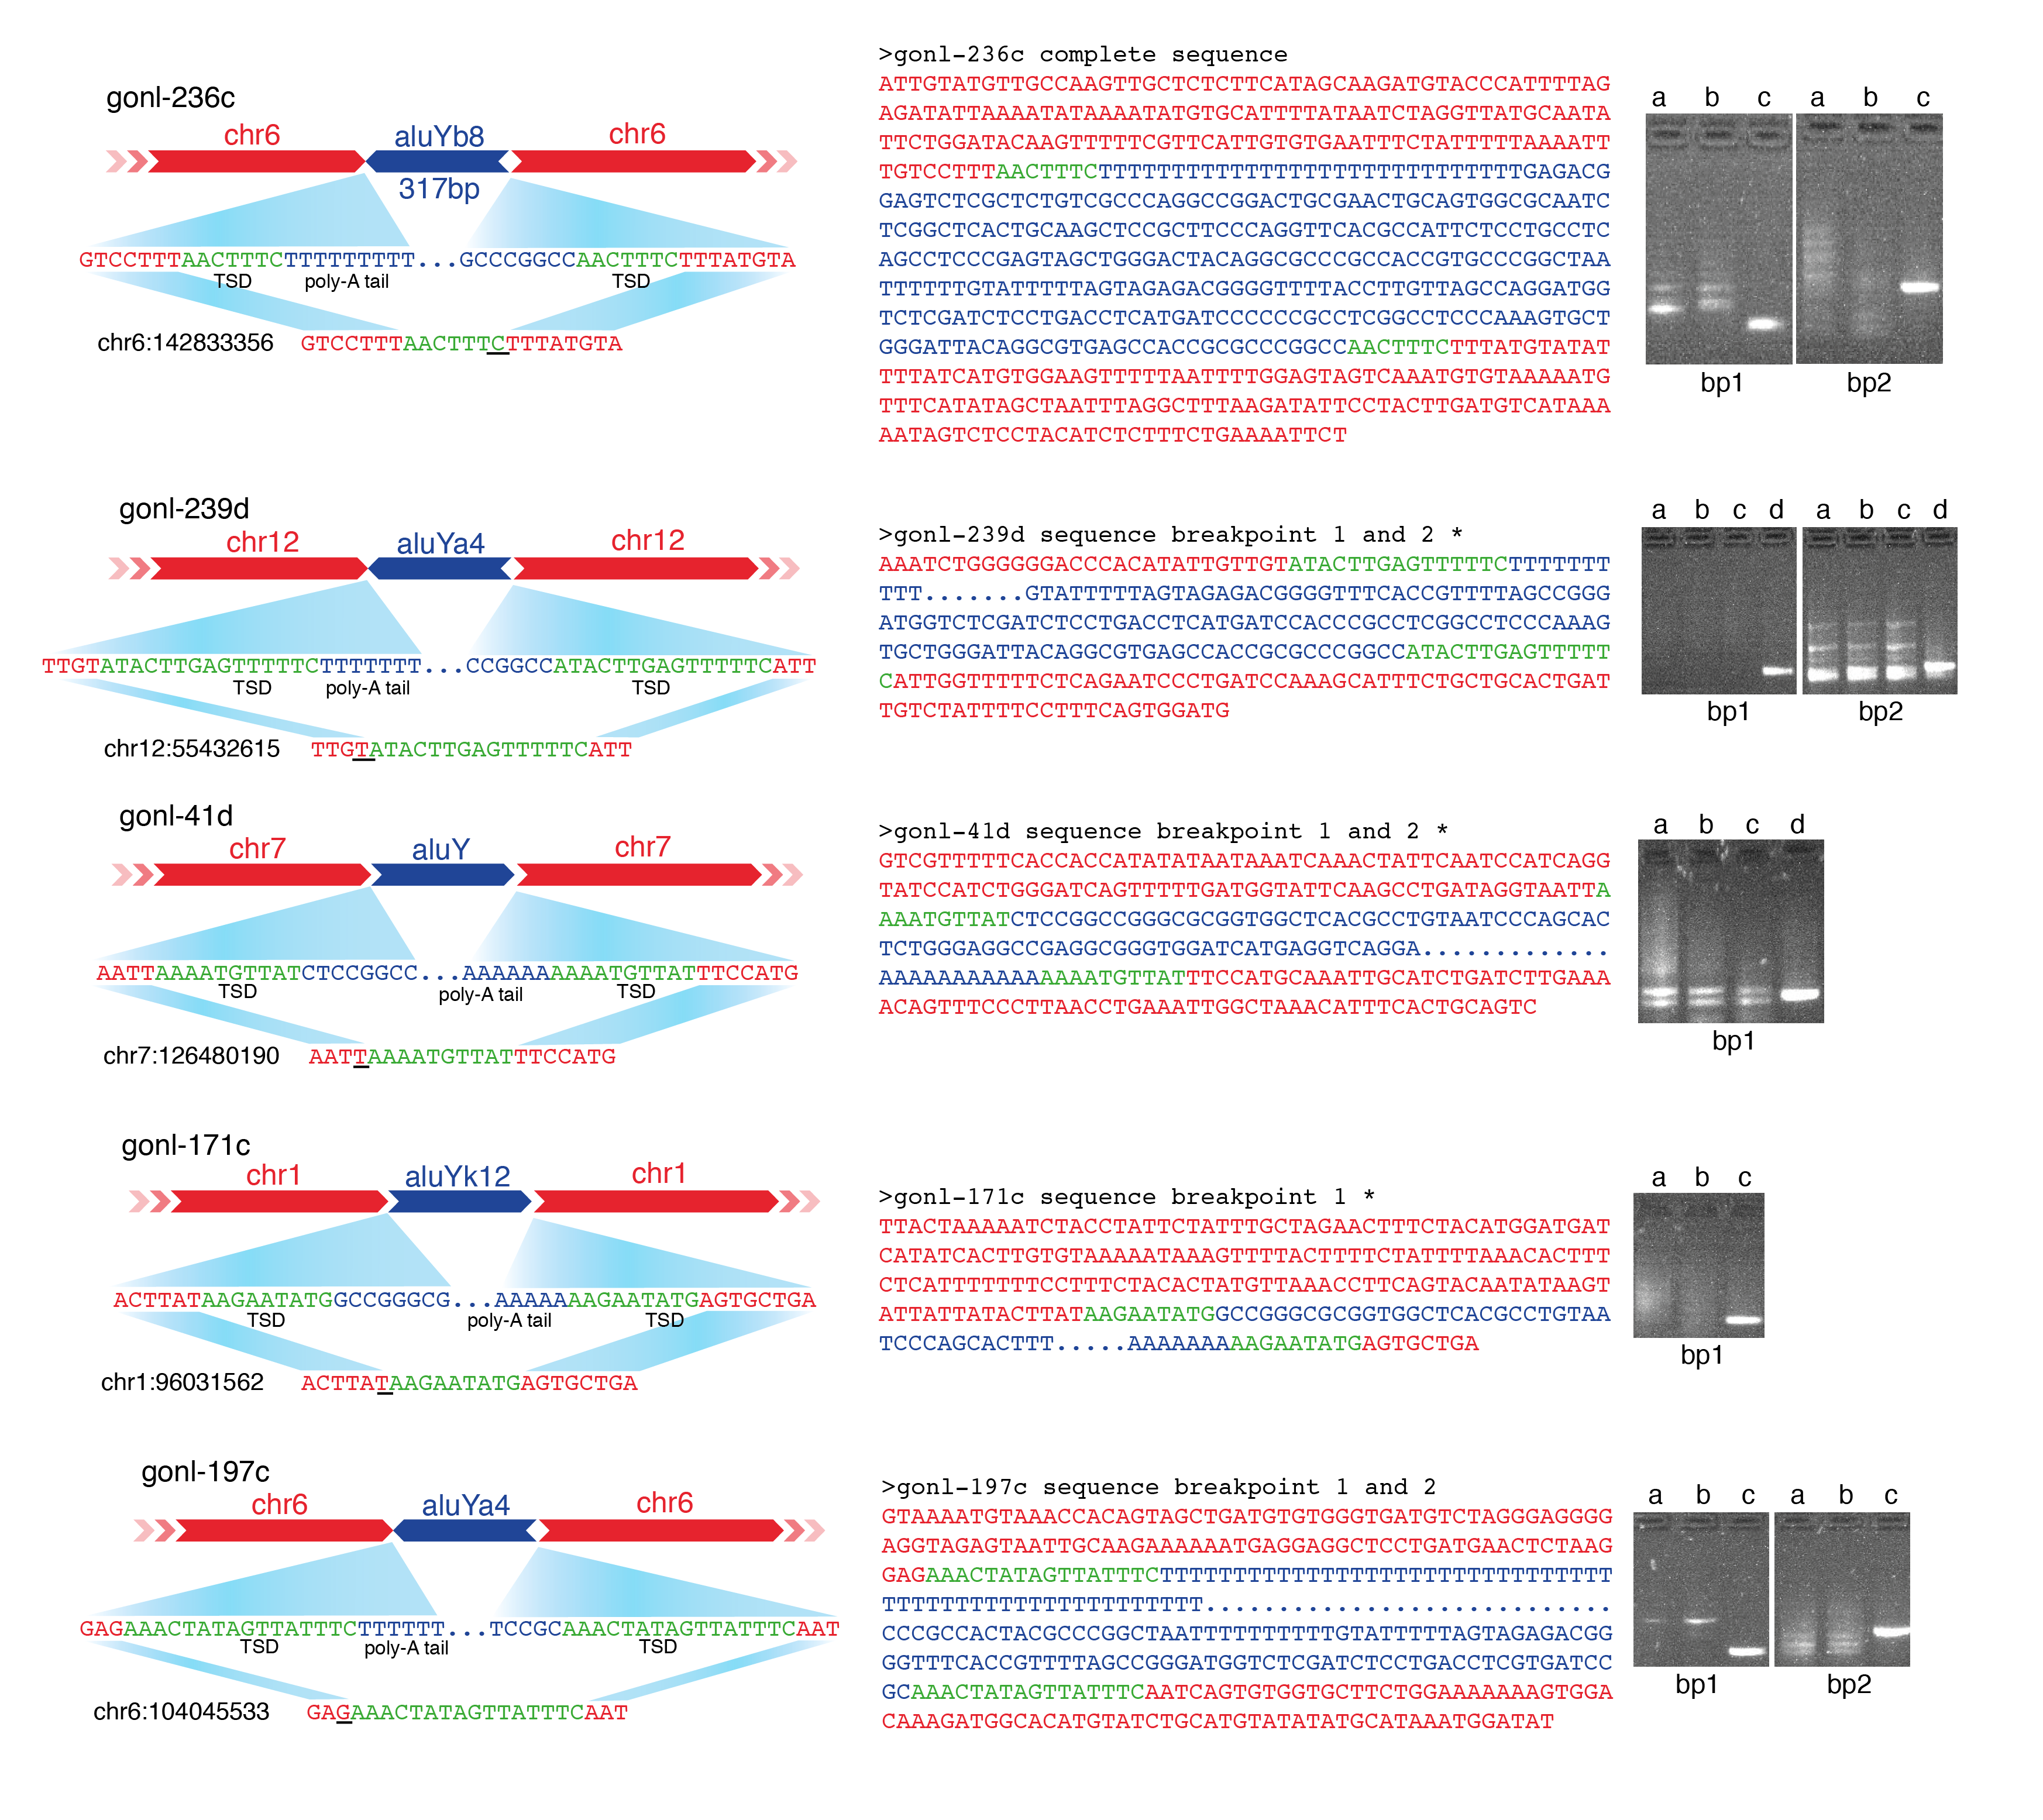


**Supplemental Figure 2. Overview of five *de novo* mobile element insertions identified in the GoNL dataset.** Breakpoint junction sequences were derived from Sanger sequencing or MiSeq sequencing of PCR products crossing the breakpoint junctions. For those instances where we could only obtain one of the breakpoint junctions by PCR, we used the HiSeq data for assembly of the other junction sequence based on discordant read pairs (*). TSD=target site duplication. (a) father, (b) mother, (c) child.

1. Supplemental Methods

# Detection of *de novo* variants

In order to create reliable *de novo* indel and structural variant (SV) call sets, we used a combination of 11 algorithms based on 6 approaches: (i) gapped reads, (ii) split-read, (iii) read pair, (iv) read depth, (v) combined approaches, and (vi) *de novo* assembly. *De novo* indels were defined as insertions and deletions of size smaller than 21bp and SVs encompass all events larger than 20bp.

*De novo* indels were called using three methods: GATK UnifiedGenotyper, GATK HaplotypeCaller and Pindel. All confident calls made by either of the three methods were merged (exact match) and all resulting putative *de novo* indels in 92 families were subjected to experimental validation. Details of the calling and filtering for each of the three algorithms can be found in the sections below.

In order to call *de novo* SVs, we used the calls from each individual GoNL SV set (Francioli et al. 2014) where the variant was predicted to be present in a single child in the entire dataset. We specifically aimed at detecting *de novo* variants with high sensitivity and therefore even *de novo* calls with marginal read support were still included. All calls were then manually inspected using IGV(Thorvaldsdóttir et al. 2013) to eliminate obvious false positives due to a miscalled parent (evidence of the SV in a small portion of the reads of one of the parents). We then took the union of all remaining calls and we merged variants which (i) were detected by multiple methods in the same child, (ii) were of the same SV type and (iii) had overlapping coordinates. We retained the most precise breakpoints for each variant based on the calling algorithm (in order: split-read, discordant read-pairs, read-depth). We excluded candidates supported only by BreakDancer, which contributed over 9k *de novo* candidates.

As a result of the above steps, subsets representing 0.12% of indel candidates (1,486/1,198,253) and 0.94% of SV candidates (601/64,067) were selected as potential *de novo* events. Further, local *de novo* assembly (SOAPdenovo (Luo et al. 2012)) was used for breakpoint fine-mapping and all calls were then subjected to experimental validation.

Because many of these algorithms were already used for calling segregating polymorphisms within the Genome of the Netherlands (GoNL) project, the description of the *de novo* variant calling and filtering starts with the GoNL raw or filtered calls (Francioli et al. 2014). The sections below highlight the additional calling or filtering steps undertaken in order to obtain the *de novo* candidates with each of the methods except for BreakDancer (Chen et al. 2009), CNVnator (Abyzov et al. 2011) and FACADE (Coe et al. 2010) for which no additional filtering was performed. The numbers of *de novo* indel and SV candidates identified by each of the tools are provided in **Supplemental Table 1**.

## GATK UnifiedGenotyper

All bi-allelic autosomal GoNL indel calls (Francioli et al. 2014) were re-genotyped using GATK PhaseByTransmission (PBT, manuscript in preparation), a trio-aware genotyper that reports the most likely genotypes (along with a phred-scaled confidence score) in a trio given a mutation prior and the observed allele frequency of the site in the population. We used a relaxed mutation prior of 1 x 10-4 in order to increase the sensitivity of our initial call set. We note that since GATK PBT does not support sex chromosomes, only autosomal chromosomes were called using this method.

All calls for which both parents were genotyped as homozygous reference and the offspring as heterozygous were extracted and the following additional filters were applied to obtain the high confidence set:

- No evidence of non-reference allele in the parents reads
- No other GoNL sample genotyped with this non-reference allele
- At least 2 reads containing the non-reference allele found in the offspring
- The PBT confidence score was >Q30

## GATK HaplotypeCaller

We used the GATK HaplotypeCaller to discover and genotype the union of regions previously called as putative indels in GoNL (Francioli et al. 2014) raw indel calls as well as Pindel calls (Ye et al. 2009) (**section 1.3**), including 1kbp flanking each variant. We filtered these calls using GATK VariantQualityScoreRecalibration (VQSR) using the following parameters:

1. **Training sets**
   1. Mills-Devine 1KG gold standard indel set (Mills et al. 2006)
2. **Features**
   1. Quality / Depth
   2. Fisher’s test on strand bias
   3. Haplotype score
   4. Read position rank sum test
   5. Inbreeding coefficient

We genotyped all autosomal calls passing VQSR with GATK PhaseByTransmissionusing a mutation prior of 10-4 to obtain sensitive trio-aware genotypes. All calls where both parents were genotyped as homozygous reference and the offspring as heterozygous were extracted and the following additional filters were applied to obtain the high confidence set:

- No evidence of non-reference allele in the parents reads
- No other GoNL sample genotyped with this non-reference allele
- At least 2 reads containing the non-reference allele found in the offspring
- The PBT confidence score was >Q30

## Pindel

We applied Pindel v0.2.4t (Ye et al. 2009) on the complete GoNL alignment BAM files (Francioli et al. 2014) using the default parameters. For this analysis, all chromosomes were split into bins of 20 Mb, with an overlap of 0.1 Mb, resulting in 113 genomic regions, spread over 75,000 files. All reads except for perfectly mapped ones were collected for indel/SV detection. Each variant calling job processes one of 113 genomic regions on all samples.

All variants observed in only a single child with at least 2 supporting reads and where the difference of reads supporting each allele on the forward and the reverse strand < 2√(#reads) were kept as confident *de novo* candidates.

## 1-2-3 SV

From the 1-2-3 SV ( <http://tools.genomes.nl/123sv.html>; Kloosterman et al. 2011) calls, only clusters that are limited to one family and exhibiting Mendelian error (i.e. contain 4 or more discordantly mapped read pairs belonging to offspring(s), but not to parents) were considered for further analysis.

## DWAC-seq

We only considered DWAC-seq (http://tools.genomes.nl/dwac-seq.html) calls where the estimated copy number change between the offspring and his/her parents was above 30%.

## MATE-CLEVER

MATE-CLEVER, LASER and several auxiliary tools from the CLEVER Toolkit (CTK) v2.0-rc1-14-gad61a0d (Marschall et al. 2013) were used to run the following customized pipeline:

1. Lanes/libraries are encoded in read groups in the GoNL BAM files. Insert size distributions were estimated for each read group separately.
2. CLEVER was run on each individual separately using options -A and -R to use the read-group distributions computed in (1). Deletions supported by at least 5 read pairs were retained.
3. CLEVER deletion calls were merged per family and reads from regions of +/- 750bp around these calls were extracted and mapped using LASER with parameters “-M 50000 --extra-sensitive -w 0.1”.
4. For each family, a list of insertions and deletions found in at least one individual of that family by CLEVER and in at least one individual of that family by LASER were retained. CLEVER and LASER calls were considered to be the same if their center point distance was <100bp and their length difference <20bp. Breakpoint coordinates reported by LASER were retained
5. This set of putative deletions was used to recalibrate all BAM files created by LASER (using laser-recalibrate). All deletions present in primary alignments after recalibration were extracted. Their support was summed up over all individuals in the cohort, and the resulting list was sorted by this cumulative support.
6. The merge-to-vcf program was run (with parameters “-o 100 -z 20 -O 20 -Z 5 -l 10”) using this ranked list of deletion calls, all CLEVER calls and LASER BAM files of the whole cohort to compute a list of high-confidence deletion candidates.
7. Using this set of candidates, BAM files of all individuals were recalibrated again.
8. Then, all these candidates where genotyped family-wise using the genotyping utility in the CTK with the following parameters: “--min_phys_cov 5 --min_gq 10 --denovo_threshold 1e-5 --variant_prior 0.1 --mapq 30”. Again, read-group-wise insert size statistics were used. Using parameter “--denovo_threshold 1e-5” ensures that only *de novo* calls are reported that are unlikely to occur in the parents (p < 0.00001) and are likely to occur in the child (p > 0.99999). In all other cases, genotypes compatible with the Mendelian laws of inheritance are reported.
9. From the returned *de novo* calls, those that occur elsewhere in the population were discarded, leading to 32 candidates across all samples (out of which 15 made part of the list of validated calls we report in this paper).

## Genome STRiP

Genome STRiP (Handsaker et al. 2011) sites with a Mendelian violation were extracted from all GoNL deletions considering only genotypes with an associated genotype quality (GQ) higher than Q13. Only variants called in a single child and with no contributing read-pair from the parents were considered.

## Mobster

Mobile element insertions (MEIs) were called using Mobster 0.1.6 with default parameters (Thung et al. 2014). Analysis was run separately for each family. Only candidate MEIs supported by 5 or more reads were considered. Offspring-specific candidates where estimated integration site (“border5-border3 range”) did not overlap any other integration site scored in other families were selected for validation.

## *De novo* indel and SV detection sensitivity analysis

Coverage from NGS data fluctuates both in systematic and random ways affecting *de novo* variation discovery power. Depending on variant size and type different signals from the data are used for discovery, which leads to variations in detection power among the different classes of variants. Indel detection mainly relies on base coverage. Thus, we restricted our indel analyses to regions of the genome covered by at least 5 reads in the child and 10 reads in each parents and no more than 100x across the entire trio. To estimate the indel sensitivity in these regions compared to deep sequencing, we combined the data of each of the 11 monozygotic twin pairs, leading to 11 samples with an average base coverage of 28x. We then called singleton polymorphisms (in the parents) discovered in GoNL (Francioli et al. 2014) by GATK UnifiedGenotyper and Pindel in these merged samples (filtered calls). For each heterozygous genotype found in these merged samples, we assessed whether it was also called in the original separate twins. We only considered genotypes with quality of at least Q20 (both in the merged and separate samples) to ensure that these would have been confidently called as *de novo* indels. We found that 93.2% of the indels (92.6% of the insertions and 93.5% of the deletions) found at 28x were also found at 14x. In addition, a subset of 24 parents from the GoNL Project was independently deeply sequenced whole-exome (Nimblegen v2 SeqCap, 44Mb, 50x mean coverage; van Rooij J, Kraaij R, Rivadeneira F, Uitterlinden AG, manuscript in preparation) on the Illumina HiSeq platform. We called indels in these exomes using Pindel, GATK UnifiedGenotyper and GATK HaplotypeCaller and considered all indels called by at least two algorithms reliable without further filtering. We then considered all singletons across the 24 whole exomes that were either not discovered (false negatives) or also singletons (true positives) in our whole-genome data to evaluate our sensitivity for *de novo* calls. We found that 83.3% of the singleton indels detected in the deep exome sequencing data were found back in the medium coverage whole-genome sequencing data (75.1% of the insertions and 87.4% of the deletions). We addressed false positives by experimental validation of all *de novo* indel candidates in 92 families.

For large SVs, the algorithms we used mostly rely on discordantly mapped read-pairs, supported by read depth analysis. Discovery power therefore mainly depends on the physical coverage. Given the relatively small number of *de novo* large SV calls in our dataset, all events showing a non-reference allele in a child but absent from the parents were subjected to experimental validation regardless of the coverage in the parents. We used 4 discordant read-pairs as a minimum threshold to call an SV in our discovery phase. On average, 98.8% of the known genome (non-N bases) of each haplotype were physically covered by 4 or more read pairs in the children.

Similarly to the indel sensitivity analysis, we used 11 MZ trio samples to compare the sensitivity of SV calling between 14x and 28x coverage data. First, we selected deletions, which were detected in the combined MZ set (28x coverage), retaining only those having evidence for the alternative allele in only one of parents. The resulting set encompasses deletions in a heterozygous state, which is also expected for *de novo* variants. For each heterozygous variant in a combined MZ twin pair (28x coverage) we checked whether it was also found in each individual MZ sample (14x coverage) by one or more algorithms (Pindel, MATE-CLEVER, 123SV and BreakDancer). We observed 69.4% sensitivity (204,624 calls detected at 14x vs 294,826 detected with 28x) for short deletions sized between 20 and 99 bases. Larger variants, exceeding 100bp are detected with 85.8% sensitivity (74,039 calls at 14x vs 86,276 at 28x).

The sensitivity for detection of MEIs by Mobster was separately tested using a set of 134 validated MEIs (127 *Alu*; 6 L1; 1 SVA) from 1000 Genomes sample NA12878 (Stewart et al. 2011). We subsampled the original data for NA12878 resulting in an average coverage of ~14X. By running Mobster on this subsampled dataset we could detect 104/134 (77.6%) validated MEIs based on a combination of both single and double cluster predictions.

# Breakpoint mapping and primer design

*De novo* assembly was performed to map breakpoints of *de novo* SV candidates, using SOAPdenovo (Luo et al. 2012). Scaffolds were aligned to the GRCh37 reference using the NCBI BLAST software (Altschul et al, 1990). Scaffolds with two high scoring segment pairs (HSPs) that are consistent with predicted structural variants were used for design of validation assays. Forward and reverse primers were placed in scaffold regions that corresponded to an HSP upstream and downstream of a predicted variant, respectively. For tandem duplication we designed amplicons that overlapped a boundary between first and second copy of duplicated segment. Primers were picked using Primer3 software (Rozen and Skaletsky 2000) to amplify a 300bp or bigger fragment that includes a predicted variant.

# Validation experiments

## Technologies

### Sanger validation

PCR primers were designed for predicted *de novo* variants (**Supplemental Table 2**) using Primer3 software. PCR was performed on families using AmpliTaq Gold (Life Technologies) and PCR reads were subjected to Sanger sequencing. For *de novo* indels, the resulting sequence was genotyped visually using Phred software (Ewing et al. 1998). For *de novo* SVs, analysis of Sanger traces was done manually using BLAST and BLAT functionalities available from the UCSC (Kent et al. 2002) and Ensembl (Flicek et al. 2013) browsers.

### Miseq validation

PCR primers were designed for predicted *de novo* variants (**Supplemental Table 2**) using Primer3 software. PCR was performed on families using AmpliTaq Gold (Life Technologies). PCR amplicons were pooled per family member (separate pools for PCR products from father, mother and child) and MiSeq libraries were generated based on the PCR amplicon pools using Nextera DNA sample preparation reagents (Illumina). Libraries were sequenced on MiSeq in 2x250bp mode.

For *de novo* indels, the MiSeq sequence data were aligned to the UCSC human reference genome build37 using BWA (Li and Durbin 2010) and variants were genotyped using both GATK UnifiedGenotyper and GATK HaplotypeCaller. Only genotypes concordant between both methods with a genotype quality (GQ) >Q30 and at least 20x coverage in the parents and 15x in the child were considered informative.

For *de novo* SVs, reads were mapped using BWA. Breakpoints were detected by performing local *de novo* assembly of MiSeq reads followed by BLAST analysis of the assembled contig against the GRCh37 genome reference.

### IonTorrent validation

A Fluidigm AccessArray was created from a list of candidate *de novo* indels and library preparation was done according to the Fluidigm protocol. These were sequenced on IonTorrent PGM and the data were de-multiplex using a Perl script using first 10 bases as one of MID set barcodes. The sequencing reads were mapped to the human genome reference build 37 using by TMAP aligner v. 3.4.1 (Life Technologies). The putative *de novo* indels were genotyped using the GATK UnifiedGenotyper and GATK HaplotypeCaller. Only calls concordant between both methods with a genotype quality (GQ) >Q30 and at least 20x coverage in the parents and 15x in the child were considered informative.

## *De novo* indel validation results

We assayed 1,169 candidate *de novo* indel sites in 99 children from 92 families (11 quartets with monozygotic twin pairs, 7 quartets with dizygotic twin pairs and 74 trios). In total 968 were successfully re-sequenced and 291 were confirmed as *de novo* events. All 153 sites (31 *de novo*) successfully re-sequenced in families with monozygotic twin pairs had concordant results between the two twins. We used 3 technologies (**section 3.1**) for these assays:

- 41 sites were assayed using both Sanger and MiSeq. 29 sites were successfully assayed using both technologies and 17 were confirmed *de novo*. All calls were concordant between the two technologies. Another 9 sites were successfully assayed on one technology and 4 were confirmed *de novo*.
- 1,038 sites were assayed using MiSeq. 847 sites produced enough sequence to be informative and 244 were confirmed *de novo*.
- 90 sites were assayed using IonTorrent. 83 sites produced enough sequence to be informative and 26 were confirmed *de novo*.

A relatively small subset of indel candidates (n=201) have failed validation due to problems with designing specific oligonucleotide primers, lack of robust amplification or ambiguous sequencing results. The indel candidates that failed in the validation assays were enriched in repetitive regions (27.9% vs 18.8%). Since successful assays exhibited a higher false-positive rate for repetitive regions (82.4% vs 63.1%), we decided not to assume a similar validation rate for candidate indels with failed assays (to the rate obtained for successful assays) and present a conservative estimate of indel rate that is based only on confirmed events.

The 31 *de novo* mutations observed in MZ twins were evenly distributed across the different families (min=1, max=5, mean=3.1). We did not detect a significant difference in the number of mutations in families with twins when compared to those with a single offspring.

## *De novo* SV validation results

We specifically aimed at detecting *de novo* variants with high sensitivity. Therefore, even *de novo* calls with marginal read support were still included for validation. The subsections below give the details of all validation experiments we undertook. **Supplemental Figures 1 and 2** show the supporting evidence for all 41 validated *de novo* SVs.

### Pilot validation of split-reads and discordant reads predictions

For an initial validation experiment we selected 39 candidate SVs predicted by 1-2-3 SV, BreakDancer, Pindel and Genome STRiP. Although the majority of candidates were inherited (i.e. false negatives in the parents), three candidates were validated as true *de novo* events, confirming the presence of *de novo* variants in our callsets.

### Large SVs / discordant pair and read depth approaches

We checked 70 calls, predicted by discordant pair (1-2-3 SV, BreakDancer), read density (DWAC-seq, CNVnator) or combined (Genome STRiP) approaches. Large (>1kbp) discordant pair-based candidates were cross-checked for showing expected read density profiles. We validated another 12 events as *de novo*, including 11 sized above 1kbp.

### Large SVs / read depth-based methods

In an attempt to verify other large events we selected calls (n=69) exceeding 600 bases, which were called using at least one of the read-depth approaches (FACADE, DWAC-seq, CNVnator), but not found by other methods. Inspection of the target regions using IGV browser (Thorvaldsdóttir et al. 2013) (IGV_check) or DWAC-seq read depth profiles (RD_check) showed that these mostly represent inherited events where RD methods failed to make a call in one of the parents. None of the variants with only read-depth support were validated as *de novo*.

### Short SVs produced by MATE-CLEVER

We used the *de novo* calls from MATE-CLEVER described in an earlier publication (Francioli et al. 2014). A total of 63 calls were tested by PCR/MiSeq sequencing, and only one additional 29 bp deletion validated as *de novo*. We analyzed the reasons for this low validation rate and found that slightly different insert size distributions of different libraries lead to these false positive calls. We adapted the MATE-CLEVER pipeline to be lane/library-aware and re-ran it as described in **Section 1.6**. The results of that run of MATE-CLEVER were included in the next round of validation (**Section 3.3.5**).

### Large scale validation

We validated the remaining two hundred and sixty five candidates. Another twenty *de novo* events were confirmed in these validation rounds.

### Mobile element insertions validation

We identified 95 mobile element insertion (MEI) candidates, including 61 LINEs, 30 SINEs, 3 SVA, 1 HERV and attempted to validate them all. Oligonucleotide primers were designed for 5’- and 3’- breakpoints based on homologous sequences shared by discordant pairs belonging to regions upstream and downstream of a candidate integration site, respectively. All primers were PCR-amplified and sequenced using Sanger/Miseq. We could confirm 5 MEIs as *de novo* (one more MEI was confirmed in 3.3.2), all SINEs (**Supplemental Figure 2**).

### Cross-validation using SNP array data

We analyzed genomic DNA of 57 GoNL family trios (171 individuals) using available high-density Illumina Omni1 Quad SNP arrays. We called *de novo* CNVs in these data using PennCNV (protocols downloaded from http://www.openbioinformatics.org/penncnv). We confirmed the *de novo* deletion (113kb) in sample gonl-42c (confidence score=6.1). Two additional *de novo* variants (a duplication of 28kb in gonl-200c and a duplication of 44kb in gonl-125c) were not detected by PennCNV, probably because the small amount of probes that covered these variants was too low (below 20 probes, see **Supplemental Table 2**). Within these 57 trios with available array data we did not detect any additional *de novo* SVs from the Illumina SNP array data beyond the SVs that were already found by WGS.

### Precision of breakpoint prediction by SV calling tools

We compared the SV breakpoints based on validation with those predicted by various SV detection tools. This showed that the median deviation of the prediction and the validated breakpoint was 10 base pairs, ranging from an exact breakpoint prediction (by split-read methods) to 1 kb deviation (depth of coverage methods). See **Supplemental Table 2** for details.

# Indel classification

We used the classification proposed by Montgomery and al. (Montgomery et al. 2013) in order to classify our indels, except for (i) Predicted Hotspots (PR) that we did not use since they were not readily available and (ii) Complex indels that are new in our data. The indel classes we used were thus defined as follows:

- HR: Indels in homopolymer runs of at least 6 identical nucleotides.
- TR: Indel in tandem repeats of at least
  - 9 nucleotides for repeat unit of 2 nucleotides
  - 12 nucleotides for repeat unit of 3 nucleotides
  - 14 nucleotides for repeat unit of 4 nucleotides
  - 15 nucleotides for repeat unit of 5 nucleotides
  - 17 nucleotides for repeat unit of 6 nucleotides
  - 19 nucleotides for repeat unit ≥7 nucleotides
- NR, CCC: Indels in non-repeat regions (not HR nor TR) but inducing a local change in copy count.
- NR, non-CCC: Indels in non-repeat regions (not HR nor TR) which do not introduce a local change in copy count

Complex: Indels substituting multiple bases for others

Homopolymer runs were annotated using the GATK VariantAnnotator. Tandem repeats were found using Sciroko (Kofler et al. 2007) (for TR of unit size <7bp) and Tandem Repeat Finder (Benson 1999) (for TR of larger unit size). We required perfect sequence identity for tandem repeats of unit size <7bp and 90% sequence identity for tandem repeats of larger unit size.

## Formation mechanism

We assumed that all indels that are located in repeat regions or that lead to a copy count chance (HR, TR, NR CCC), have arisen by polymerase slippage.

For simple non copy count changing indels (NR non-CCC), we expect most of these to emerge through non-homologous end-joining (NHEJ) given the short size of these events and the breakpoints presenting little or no microhomology and therefore assigned NHEJ as a possible mechanism for all of these (Hastings et al. 2009). In addition to NHEJ, we also looked whether some:

- contained larger microhomologies (>3bp), possible signatures of replication slippage or microhomology-mediated end joining (MMEJ) (Hastings et al. 2009; Albertini et al. 1982; McVey and Lee 2008)
- were located between palindromes, possibly indicating that the formation of a secondary structure played a role in their formation. We only looked at perfect palindromes of at least 6bp as these were previously shown to be overrepresented around indels when compared to the genomic background (Montgomery et al. 2013).

For complex indels, we noticed that many of the derived alleles were forming palindromes with neighboring sequence. We used a minimum size of 6bp for palindromes, consistent with palindromic annotations of the context around simple NR non-CCC indels. Such complex indels were previously described in cancer studies and template switching was proposed as a possible mechanism for their emergence (Ripley 1982, 1990). We also annotated complex indels where the inserted sequence was partially or entirely templated from neighboring sequence. Such replacements with a templated sequence were observed in *C. elegans* and theta-mediated end joining (TMEJ) was proposed as a mechanism (Roerink et al. 2014).

Summary counts of mechanisms can be found in **Table 1**.

## Frequency of indel categories

Using the definitions of homopolymer runs (HR) and tandem repeats (TR) as described above, we computed the total number of reference bases spanned by such runs in the GoNL accessible genome (Francioli et al. 2014) in order to estimate the genomic background. We used a proportion test to assess whether the proportion of *de novo* indels in TR and HR were compatible with their relative proportion in the reference genome.

While our results show very clear indel enrichment in these regions, it is likely that these numbers are conservative since the discovery and genotyping of indels in such repetitive regions of the genome in short-read sequencing data is more challenging than in non-repetitive regions. In our data, this is partly reflected by elevated proportions of inconclusive validation assays (27.9% vs 18.8%, chisq p = 0.0016) and of false positives (82.4% vs 63.1%, chisq p = 8.0x10-7) in repetitive vs non-repetitive regions, respectively.

When looking at complex indels, we noticed that a 5/14 of the derived alleles formed palindromic repeats with neighboring sequence whereas this was observed for only 1 of the 70 insertions in our set. We used a chi square test to assess whether this difference was significant.

## Comparison against inherited indels

To study the difference between *de novo* and inherited indels, we compared the *de novo* indels observed against the polymorphic indels discovered in the GoNL dataset (Francioli et al. 2014). Because the algorithms used to find GoNL indels could not identify complex indels, we ran the GATK HaplotypeCaller using the --mergeVariantsViaLD option on the GoNL data. The resulting set of indels (union of previously identified indels and complex indels) were used as comparison. We note that using this strategy on the complex *de novo* indels, the HaplotypeCaller correctly identified 12/14 (86%) of these as complex events. The inherited indels in the GoNL data were annotated with respect to their class and mechanisms using the same pipeline as for the *de novo* ones.

# *De novo* SV formation mechanisms

Analysis of mutation formation mechanisms of SVs was performed using BreakSeq software v. 1.3 (Lam et al. 2010). Genome references (GRCh37/hg19, panTro4, rheMac3, ponAbe2), repeat-masked reference, BLAT program and annotation databases were downloaded from the UCSC website (http://genome.ucsc.edu). We used default settings for annotation of variants longer than 50 base pairs (annotation of shorter variants is not supported by BreakSeq). Because BreakSeq does not support mechanism prediction for tandem duplications, we used BLAST to determine the similarity between 200bp genomic segments at the beginning and end of the tandemly duplicated segment (duplication start +/- 100bp and duplication end +/- 100bp). Tandem duplications showing homologous sequences at the breakpoints with a similarity > 90%, at least 50bp in length and in the correct orientation (+/+ alignment) were assigned to the NAHR mechanism, while the remaining tandem duplications were classified as NHR.

# Genome context and functional effects

To determine the number of affected genomic bases by indels, we calculated one base per insertion, the variant length for each deletion and the number of replaced genomic bases for complex indels. For SVs, we took the SV length for duplications and deletions, while for MEIs the lengths of the target site duplications were used. To determine the number of affected coding bases, we intersected *de novo* substitutions, indels and SVs with protein coding exons retrieved from the Ensembl database (version 74, http://www.ensembl.org) (Flicek et al. 2014). Both 3’-UTR, 5’-UTR sequences and non-coding exons were excluded from the intersection. *De novo* variants were overlapped with three types of ENCODE histone modification datasets (H3K4Me1, H3K4Me3 and H3K27ac) derived from 16 different cell lines (http://genome.ucsc.edu/cgi-bin/hgFileSearch?db=hg19, **Supplemental Table 5**) (The ENCODE Project Consortium). For each of these histone modification data we determined the number of bases that were affected by *de novo* substitutions (n=11,618), indels (n=291) and SVs (n=41), respectively. Subsequently, the average number of affected bases per individual was calculated (n=258 for substitutions and SVs; n=99 for indels). We repeated the procedure for inherited variation (indels, inversions, deletions, duplication, MEIs) found in the GoNL project (Francioli et al. 2014) in order to compare the footprint of inherited and *de novo* variation.

1. The Genome of the Netherlands consortium

**Steering committee**

Cisca Wijmenga1,2 (Principal Investigator), Morris A. Swertz1,2, Cornelia M. van Duijn3, Dorret I. Boomsma4, P. Eline Slagboom5, Gertjan B. van Ommen6, Paul I.W. de Bakker7,8-10

**Analysis group**

Morris A. Swertz1,2 (Co-Chair), Laurent C. Francioli7, Freerk van Dijk1,2, Androniki Menelaou7, Pieter B.T. Neerincx1,2, Sara L. Pulit7, Patrick Deelen1,2, Clara C. Elbers7, Pier Francesco Palamara11, Itsik Pe’er11,12, Abdel Abdellaoui4, Wigard P. Kloosterman7, Mannis van Oven13, Martijn Vermaat14, Mingkun Li15, Jeroen F.J. Laros14, Mark Stoneking15, Peter de Knijff16, Manfred Kayser14, Jan H. Veldink17, Leonard H. van den Berg17, Heorhiy Byelas1,2, Johan T. den Dunnen14, Martijn Dijkstra1,2, Najaf Amin3, K. Joeri van der Velde1,2, Jouke Jan Hottenga4, Jessica van Setten7, Elisabeth M. van Leeuwen3, Alexandros Kanterakis1,2, Mathijs Kattenberg4, Lennart C. Karssen3, Barbera D.C. van Schaik18, Jan Bot19, Isaäc J. Nijman7, Ivo Renkens7, David van Enckevort20, Hailiang Mei20, Vyacheslav Koval21, Karol Estrada21, Carolina Medina-Gomez21, Kai Ye22,5, Eric-Wubbo Lameijer5, Matthijs H. Moed5, Jayne Y. Hehir-Kwa23, Robert E. Handsaker10,24, Steven A. McCarroll10,24, Shamil R. Sunyaev9,10, Paz Polak9, Dana Vuzman9, Mashaal Sohail9, Fereydoun Hormozdiari25, Tobias Marschall26, Alexander Schönhuth26, Victor Guryev27, Paul I.W. de Bakker7,8-10 (Co-Chair);

**Cohort collection and sample management group**

P. Eline Slagboom5, Marian B. Beekman5, Anton J.M. de Craen5, H. Eka D. Suchiman5, Albert Hofman3, Cornelia M. van Duijn3, Ben Oostra28, Aaron Isaacs3, Najaf Amin3, Fernando Rivadeneira21, André G. Uitterlinden21, Dorret I. Boomsma9, Gonneke Willemsen9, LifeLines Cohort Study29, Mathieu Platteel1, Steven J. Pitts30, Shobha Potluri30, Purnima Sundar30, David R. Cox30,36;

**Whole-genome sequencing**

Qibin Li31, Yingrui Li31, Yuanping Du31, Ruoyan Chen31, Hongzhi Cao31, Ning Li32, Sujie Cao32, Jun Wang31,33,34;

**Ethical, Legal, and Social Issues**

Jasper A. Bovenberg35, Margreet Brandsma6;

**Affiliations**

1 Department of Genetics, University Medical Center Groningen, University of Groningen, Groningen, The Netherlands

2 Genomics Coordination Center, University Medical Center Groningen, University of Groningen, Groningen, The Netherlands

3 Department of Epidemiology, Erasmus Medical Center, Rotterdam, The Netherlands

4 Department of Biological Psychology, VU University Amsterdam, Amsterdam, The Netherlands

5 Section of Molecular Epidemiology, Department of Medical Statistics and Bioinformatics, Leiden University Medical Center, Leiden, The Netherlands

6 Department of Human Genetics, Leiden University Medical Center, Leiden, The Netherlands

7 Department of Medical Genetics, University Medical Center Utrecht, Utrecht, The Netherlands

8 Department of Epidemiology, University Medical Center Utrecht, Utrecht, The Netherlands

9 Division of Genetics, Brigham and Women's Hospital, Harvard Medical School, Boston, MA, USA

10 Program in Medical and Population Genetics, Broad Institute of Harvard and MIT, Cambridge, MA, USA

11 Department of Computer Science, Columbia University, New York, NY, USA

12 Department of Systems Biology, Columbia University, New York, NY, USA

13 Department of Forensic Molecular Biology, Erasmus Medical Center, Rotterdam, The Netherlands

14 Leiden Genome Technology Center, Department of Human Genetics, Leiden University Medical Center, Leiden, The Netherlands

15 Department of Evolutionary Genetics, Max Planck Institute for Evolutionary Anthropology, Leipzig, Germany

16 Forensic Laboratory for DNA Research, Department of Human Genetics, Leiden University Medical Center, Leiden, The Netherlands

17 Department of Neurology, University Medical Center Utrecht, Utrecht, The Netherlands

18 Bioinformatics Laboratory, Department of Clinical Epidemiology, Biostatistics and Bioinformatics, Amsterdam Medical Center, Amsterdam, The Netherlands

19 SURFsara, Science Park, Amsterdam, The Netherlands

20 Netherlands Bioinformatics Centre, Nijmegen, The Netherlands

21 Department of Internal Medicine, Erasmus Medical Center, Rotterdam, The Netherlands

22 The Genome Institute, Washington University, St. Louis, MO, USA

23 Department of Human Genetics, Radboud University Nijmegen Medical Centre, Nijmegen, The Netherlands

24 Department of Genetics, Harvard Medical School, Boston, MA, USA

25 Department of Genome Sciences, University of Washington, Seattle, WA, USA

26 Centrum voor Wiskunde en Informatica, Life Sciences Group, Amsterdam, The Netherlands

27 European Research Institute for the Biology of Ageing, University Medical Center Groningen, University of Groningen, Groningen, The Netherlands

28 Department of Clinical Genetics, Erasmus Medical Center, Rotterdam, The Netherlands

29 A full list of the LifeLines Cohort Study members can be found in the under **IV**

30 Rinat-Pfizer Inc, South San Francisco, CA, USA

31 BGI-Shenzhen, Shenzhen, China

32 BGI-Europe, Copenhagen, Denmark

33 Department of Biology, University of Copenhagen, Copenhagen, Denmark

34 The Novo Nordisk Foundation Center for Basic Metabolic Research, University of Copenhagen, Copenhagen, Denmark

35 Legal Pathways Institute for Health and Bio Law, Aerdenhout, The Netherlands

36 Deceased

1. The LifeLines Cohort Study

Behrooz Z Alizadeh1, Paul de Bakker2, H Marike Boezen1, Pim van der Harst2, Gerjan Navis3, Marianne Rots4, Salome Scholtens5, Harold Snieder1, Ronald P Stolk1,5, Morris Swertz6, Bruce HR Wolffenbuttel7, Cisca Wijmenga6

**Affiliations**

1 Department of Epidemiology, University Medical Center Groningen, University of Groningen, The Netherlands

2 Department of Cardiology, University Medical Center Groningen, University of Groningen, The Netherlands

3 Department of Nephrology, University Medical Center Groningen, University of Groningen, The Netherlands

4 Department of Medical Biology, University Medical Center Groningen, University of Groningen, The Netherlands

5 LifeLines Cohort Study, University Medical Center Groningen, University of Groningen, The Netherlands

6 Department of Genetics, University Medical Center Groningen, University of Groningen, The Netherlands

7 Department of Endocrinology, University Medical Center Groningen, University of Groningen, The Netherlands

1. Supplemental References

Abyzov A, Urban AE, Snyder M, Gerstein M. 2011. CNVnator: an approach to discover, genotype, and characterize typical and atypical CNVs from family and population genome sequencing. *Genome Res* **21**: 974–984.

Albertini M, Hofer M, Calos MP, Miller JH. 1982. On the formation of Spontaneous Deletions: The Importance of Short Sequence Homologies in the Generation of Large Deletions. *Cell* **29**: 319–328.

Altschul SF, Gish W, Miller W, Myers EW, Lipman DJ. 1990. Basic local alignment search tool. *J Mol Biol* **215**: 403-410.

Benson G. 1999. Tandem repeats finder: a program to analyze DNA sequences. *Nucleic Acids Res* **27**: 573–580.

Chen K, Wallis JW, McLellan MD, Larson DE, Kalicki JM, Pohl CS, McGrath SD, Wendl MC, Zhang Q, Locke DP, et al. 2009. BreakDancer: an algorithm for high-resolution mapping of genomic structural variation. *Nat Methods* **6**: 677–81.

Coe BP, Chari R, MacAulay C, Lam WL. 2010. FACADE: a fast and sensitive algorithm for the segmentation and calling of high resolution array CGH data. *Nucleic Acids Res* **38**: e157.

Ewing B, Hillier L, Wendl M, Green P. 1998. Base-calling of automated sequencer traces using Phred. I. Accuracy assessment. *Genome Res* 175–185.

Flicek P, Ahmed I, Amode MR, Barrell D, Beal K, Brent S, Carvalho-Silva D, Clapham P, Coates G, Fairley S, et al. 2013. Ensembl 2013. *Nucleic Acids Res* **41**: D48–55.

Flicek P, Amode MR, Barrell D, Beal K, Billis K, Brent S, Carvalho-Silva D, Clapham P, Coates G, Fitzgerald S, et al. 2014. Ensembl 2014. *Nucleic Acids Res* **42**: D749-55.

Francioli LC, Menelaou A, Pulit SL, van Dijk F, Palamara PF, Elbers CC, Neerincx PBT, Ye K, Kloosterman WP, Deelen P, et al. 2014. Whole-genome sequence variation, population structure and demographic history of the Dutch population. *Nat Genet* **46**: 818–825.

Handsaker RE, Korn JM, Nemesh J, Mccarroll SA. 2011. Discovery and genotyping of genome structural polymorphism by sequencing on a population scale. *Nat Genet* **43**: 269–276.

Hastings P, Lupski JR, Rosenberg SM, Ira G. 2009. Mechanisms of change in gene copy number. *Nat Rev Genet* **10**: 551–564.

Kent WJ, Sugnet CW, Furey TS, Roskin KM, Pringle TH, Zahler AM, Haussler D. 2002. The Human Genome Browser at UCSC. *Genome Res* **12**: 996–1006.

Kloosterman WP, Guryev V, van Roosmalen M, Duran KJ, de Bruijn E, Bakker SCM, Letteboer T, van Nesselrooij B, Hochstenbach R, Poot M, et al. 2011. Chromothripsis as a mechanism driving complex de novo structural rearrangements in the germline. *Hum Mol Genet* **20**: 1916–24.

Kofler R, Schlötterer C, Lelley T. 2007. SciRoKo: a new tool for whole genome microsatellite search and investigation. *Bioinformatics* **23**: 1683–5.

Lam HYK, Mu XJ, Stütz AM, Tanzer A, Cayting PD, Snyder M, Kim PM, Korbel JO, Gerstein MB. 2010. Nucleotide-resolution analysis of structural variants using BreakSeq and a breakpoint library. *Nat Biotechnol* **28**: 47–55.

Li H, Durbin R. 2010. Fast and accurate long-read alignment with Burrows-Wheeler transform. *Bioinformatics* **26**: 589–595.

Luo R, Liu B, Xie Y, Li Z, Huang W, Yuan J, He G, Chen Y, Pan Q, Liu Y, et al. 2012. SOAPdenovo2: an empirically improved memory-efficient short-read de novo assembler. *Gigascience* **1**: 18.

Marschall T, Hajirasouliha I, Schönhuth A. 2013. MATE-CLEVER: Mendelian-inheritance-aware discovery and genotyping of midsize and long indels. *Bioinformatics* **29**: 3143–3150.

McVey M, Lee SE. 2008. MMEJ repair of double-strand breaks (director’s cut): deleted sequences and alternative endings. *Trends Genet* **24**: 529–538.

Mills R, Luttig C, Larkins C. 2006. An initial map of insertion and deletion (INDEL) variation in the human genome. *Genome Res* **16**: 1182–1190.

Montgomery SB, Goode DL, Kvikstad E, Albers CA, Zhang ZD, Mu XJ, Ananda G, Howie B, Karczewski KJ, Smith KS, et al. 2013. deletion variants identified in 179 human genomes The origin, evolution, and functional impact of short insertion – deletion variants identified in 179 human genomes. *Genome Res* **23**: 749–761.

Ripley LS. 1990. Frameshif Mutation: Determinants of Specificity. *Annu Rev Genet* **24**: 189–213.

Ripley LS. 1982. Model for the participation of quasi-palindromic DNA sequences in frameshift mutation. *Proc Natl Acad Sci U S A* **79**: 4128–4132.

Roerink SF, Schendel R, Tijsterman M. 2014. Polymerase theta-mediated end joining of replication-associated DNA breaks in C. elegans. *Genome Res* **24**: 954–962.

Rozen S, Skaletsky H. 2000. Primers3 on the WWW for General Users and for Biologist Programmers. *Methods Mol Biol* **132**: 265–386.

Stewart C, Kural D, Strömberg MP, Walker JA, Konkel MK, Stütz AM, Urban AE, Grubert F, Lam HYK, Lee WP, et al. 2011. A comprehensive map of mobile element insertion polymorphisms in humans. *PLoS Genet* **7**: e1002236.

The Encode Project Consortium. 2007. Identification and analysis of functional elements in 1% of the human genome by the ENCODE pilot project. *Nature* **447**: 799–816.

Thorvaldsdóttir H, Robinson JT, Mesirov JP. 2013. Integrative Genomics Viewer (IGV): high-performance genomics data visualization and exploration. *Brief Bioinform* **14**: 178–92.

Thung DT, de Ligt J, Vissers LE, Steehouwer M, Kroon M, de Vries P, Slagboom EP, Ye K, Veltman JA, Hehir-Kwa JY. 2014. Mobster: accurate detection of mobile element insertions in next generation sequencing data. *Genome Biol* **15**: 488.

Ye K, Schulz MH, Long Q, Apweiler R, Ning Z. 2009. Pindel: a pattern growth approach to detect break points of large deletions and medium sized insertions from paired-end short reads. *Bioinformatics* **25**: 2865–2871.
