# Supplementary material for: Characteristics of de novo structural changes in the human genome
Source: HighWire-hosted journal article supplement (doi:10.1101/gr.185041.114), 2015-04-16
Supplement: Supplemental_Table_1.xlsx [file Supplemental_Table_1.xlsx]

## Sheet: Sheet1
Supplemental Table 1. Summary on de novo variant calling, filtering and confirmation.
Variant type	Algorithm#	Approach	Reported in Francioli et al, 2014, Nat Gen 46(8):818-25	Candidate de novo calls	Filtered, assembled breakpoints, entered validation*	Validated as de novo
Indels$	GATK UG	Gapped reads	1.2 million	9948	1122	223
Indels$	GATK HC	Gapped reads		10934	1212	228
Indels$	Pindel	Split-reads		1557	559	137
Deletions	GATK UG	Gapped reads	27.5 thousand	138	6	1
Deletions	GATK HC	Gapped reads		317	31	4
Deletions	Pindel	Split-reads		64	14	11
Deletions	MATE-CLEVER	Split-reads, read pairs		616	85	12
Deletions	1-2-3 SV	Read-pairs		330	236	15
Deletions	Breakdancer	Read-pairs		912	29	5
Deletions	GenomeSTRIP	Read-pairs, read depth		13	13	7
Deletions	CNVnator	Read depth		202	40	0
Deletions	DWACseq	Read depth		296	53	1
Deletions	FAÇADE	Read depth		116	10	5
Tandem duplications	Pindel	Split-reads	-	3	0	0
Tandem duplications	1-2-3 SV	Read-pairs	-	62	34	8
Tandem duplications	Breakdancer	Read-pairs	-	32	7	4
Duplications	CNVnator	Read depth	-	139	18	1
Duplications	DWACseq	Read depth	-	218	24	1
Duplications	FAÇADE	Read depth	-	166	20	4
Inversions	Pindel	Split-reads	-	0	0	0
Inversions	1-2-3 SV	Read-pairs	-	27	16	0
Inversions	Breakdancer	Read-pairs	-	8	3	0
Mobile element insertions	Mobster	Split-reads, read-pairs	-	160	95	6
Interchromosomal events	1-2-3 SV	Read-pairs	-	30	17	1
Interchromosomal events	Breakdancer	Read-pairs	-	5	1	0
$ We defined indels as insertion/deletions with a size difference smaller than 21 bp between the reference and alternative alleles.
# Individual variants may be discovered by multiple methods and thus can contibute to multiple values listed in this table.
* SVs were selected and validated across all 250 families; indels were only selected and validated in 92 families (11 quartets with monozygotic twin pairs, 7 quartets with dizygotic twin pairs, 74 trios), see methods for details about indel filtering procedure.
