# Supplementary material for: Characteristics of de novo structural changes in the human genome
Source: HighWire-hosted journal article supplement (doi:10.1101/gr.185041.114), 2015-04-16
Supplement: Supplemental_Table_2.xlsx [file Supplemental_Table_2.xlsx]

## Sheet: SVs
Supplemental Table S2. List of validated de novo SVs (this spreadsheet) and indels (see next spreadsheet)
	Junction coordinates				Predicted breakpoints and difference with corresponding validated breakpoints										Overlap with external data (80% reciprocal)											Illumina Omni 1 M SNP array (57 families)			primer sequences
ID	Chr	Start (Last aligned base upstream of SV)	End (first aligned base downstream of SV)	Type	Predicted Start	Predicted End	Diff_Starts	Diff_Ends	Size	Breakpoint context	Haplotype	SNPs and genotypes (Father/Mother/Offspring) used to determine haplotype	Mechanism (BreakSeq)	Effect	DGV and 1KG phase1	Detected by	Sex	Province	Father aac	Mother aac	repeats_bp1	repeats_bp2	SD_bp1	SD_bp2	junction sequence (SVs >100 bp)	ID	Probes	PennCNV_result	Forward	Reverse
gonl-1c	4	67594166	67594270	deletion	67594166	67594282	0	12	103	blunt	unknown	No informative markers	NHR	Gene desert		123SV	Male	Utrecht	30	30	No RepeatFeature	No RepeatFeature	No SD	No SD	TAATTGAAGAAAACAACACAGCCAAAGGGAGGCAATTTATCTTGTGAGCCTCCCTGTAGATTGTAAGATTTTTTTAAAAGTAGTTTTAAGAGGAATTAAATTTCTTTGGACTTT	gonl-1c			CACAGCTATCGGCCCCTTAG	GGTCTCTCTGCTGAGGTTGC
gonl-6c	4	102684413	102740027	duplication	102684414	102740030	1	3	55613	5 bp insert	paternal	rs13149344(GA/AA/GGA); rs11097754(AA/AC/AAC)	NHR	2 exon duplication in BANK1 gene		123SV, BrD, mrsFastRD	Male	Noord Holland	26	24	HERV16-int(LTR/ERVL)	MER44A(DNA/MER2_type)	No SD	No SD	TCTCCACGAATAAAGAAAGATTACTGTCAGCAAGAATTTGGAGAAATCTGGGCACAAAAAATTTTCAGGTGCATAGACCCAGAGA	gonl-6c			TCTGGGTCTCTGGGTCTATG	GGTCTTGGAAGGTATTCTCC
gonl-22c	4	102228227	102228279	deletion	102228226	102228276	1	3	51	4 bp microhomology	maternal	rs2583398(TT/TG/TG) allele G is seen in discordant reads	NHR	Intron of PPP3CA		Pindel, GATK HC	Male	Overijssel	33	28	No RepeatFeature	No RepeatFeature	No SD	No SD		gonl-22c	0		CCACCACCTTCACTTCTCGG	CACAAGTGGAGCTAGGGCAA
gonl-41d	7	126480190	126480201	AluY insertion	126480192	126480192	2	9	>99	10bp TSD	unknown	No informative markers	MEI	Intron of GRM8 gene		Mobster	Female	Zeeland	28	27	MamRep434(DNA/Tiger)	MamRep434(DNA/Tiger)	No SD	No SD		gonl-41d			GGGGAGCTCAAGAGTGCTTA	CCTGACCTCATGATCCACCC
gonl-42c	3	4118993	4232021	deletion	4118970	4232064	23	43	113027	1 bp microhomology	maternal	rs1596472(GA/GG/A-); rs142759110(GA/AA/G-)	NHR	Intron of SUMF1 gene	dgv8179n54 (98.3% and 88%)	123SV, mrsFastRD	Female	Noord Holland	39	27	L1PA6(LINE/L1)	No RepeatFeature	No SD	No SD	AGAACTAGAAATACCATTTGACCCAGCAATCCCATTACTGGGTATACGTGTCTGTAGGCAGCTCCACATTACCACGTAGGCTTGCAT	gonl-42c	45	Called (score=6.1)	GAAACAACAGACGCTGGAG	TAAACAGGCCCACAGAGC
gonl-44c	12	38046429	38048304	duplication	38046439	38048335	10	31	1874	7 bp perfect homology	paternal	rs11495511(AG/GG/AAG), allele A is seen in discordant reads	VNTR	Pericentromeric, gene desert		123SV	Male	Limburg	31	32	ALR/Alpha(Satellite/centr)|trf(trf)	ALR/Alpha(Satellite/centr)|trf(trf)	No SD	No SD	GAGGTGAACCTTTCATTCTATTGAGCAGTCTTGATACACTCTCTTTGTAGAATCTGAAAGTGGATATTCGGA_GGGTTTGAGGCCTATTGTGGAAAAGGAAATATCTTCACATAAAAAACTTCACAGAAGCATTCT	gonl-44c			AAGCCACAAAGCCCTCCAAA	GCCCTATTTGGCCAATGGTG
gonl-51c	2	128120888	128250348	duplication	128120895	128250321	7	27	129459	blunt	paternal	rs67771362(GG/GA/GGA); rs2139142(CC/CT/CCT)	NHR	Duplication of Proc gene and exons of 2 other genes		123SV, BrD, mrsFastRD	Female	Limburg	26	28	No RepeatFeature	MIRb(SINE/MIR)	No SD	No SD	CACAGCCACCTTCTAGCTATGTGACCTTGACGAGTCGTTTAACTTCTCTGCATCTTAATTTTGATTTTAAAAATGATAAAATGCTAACATCCTCTAAAAATTAAAAATCCTTCCA	gonl-51c			AGGTTCAGGCAACGTGTTGA	GCACCAGAAGCAAAACTCCG
gonl-52c	9	11963779	12048229	deletion	11963776	12048226	3	3	84449	4 bp microhomology	maternal	Chr9:11977024(TC/CC/T-);	NHR	Gene desert	dgv12550n54 (96.8% and 93.5%)	123SV, BrD, mrsFastRD, Pindel	Female	Noord Brabant	24	26	MER89(LTR/ERV1)	No RepeatFeature	No SD	No SD	CCTTCCCCATCCCAGCTGCCTCCACTCAAGAGATGTCAGAAGTTTTACAAAATTAGCCCCAAGGAGCAATTTAAAATCAGCTGGTT	gonl-52c			CACCAATAGGGAGGAATGAC	AACAGCAACTAACAGGTTTCC
gonl-52c	9	131912092	131912434	deletion	131912063	131912458	29	24	341	2bp microhomology	paternal	rs4836641(TT/TC/C-);	NHR	Downstream of PPP2R4		123SV, BrD, Clever	Female	Noord Brabant	24	26	No RepeatFeature	L2(LINE/L2)	No SD	No SD	GGTAGCCGGTGGATTATGGAGAAAATAACGTCAATTAGAGAAGGAGTTATGACAGGGAGCCGAGCAGCCAAGAACCCCAATTCTTGG	gonl-52c			TGGTTGACTTCTCTCTGAGC	CCTCATCCTCAGCACCTC
gonl-60c	2	83902039	83903237	deletion	83902044	83903238	5	1	1197	blunt	paternal	rs9679270(AA/GG/G-); rs981141(AA/TT/AT) allele A is seen in discordant reads	NHR	Gene desert		123SV, BrD, GSTRiP, Clever, Pindel	Female	Noord Brabant	39	33	L1MEc(LINE/L1)	dust(dust)	No SD	No SD	TTTACTAATATGTAATAATGTTTTAATCTATATATAAGTGATACAGGGTTGTTTTCCAGATAGATTTTGCATTTTGATATGTTGTTCTGTTTTAGAATATG	gonl-60c			TGAGCCTGCATCATGATTCAA	GACCTCGTGATCCACCAGTC
gonl-70c	5	43715646	43769508	deletion	43715626	43769504	20	4	53861	1 bp insert	maternal	rs72760488(AC/CC/A-); rs4574552(GA/AA/G-)	NHR	Downstream of NNT gene		123SV, GSTRiP, mrsFastRD, Pindel	Female	Zuid Holland	27	24	MLT1H2(LTR/MaLR)	No RepeatFeature	No SD	No SD	CCAGTTACTATGTTGAAAAGATGCTTGGGCTGAATCATGATCATTCTGAATGATCAAGTAGAAAAAGAGTTGTGCAGG	gonl-70c			AGCACTTATTCCTGCAAATG	AAGTGTGTTGGCTGAAGGTC
gonl-78c	4	738470	741147	deletion	738742	741497	272	350	2676	365 bp homology (98% similarity)	unknown	No informative markers	NAHR	Intron of PCFG gene	nsv513112 (100% and 82.8%)	123SV	Male	Zeeland	29	26	trf(trf)	trf(trf)	SD	SD	CCGCGGAGGAGAAGCCGGAGGAGGACAACGACTACCACCGCAGCGACGAGCAGGTGGGCGGGGCCCGGGGGTCGCTGCAGTGTTAGTGCTCGCCGTGGAGGCGTGAGCAGGTGGGCGGGGCCCGGGGGTCGCTGCAGTGTTAGTGCTCGCCGTGGAGGCGTGAGCAGGTGGGCGGGGCCCCGGGGGTCGCTGCAGTGTTAGTGCTCGCCGTGGAGGCGTGAGCAGGTGGGCGGGGCCCGGGGGTCGCTGCAGTGTTAGTGTTCGCCGTGGAGGCGTGAGCAGGTGGGCGGGGCCCCGGGCCTCCGGGACACTCCTGTATTAGTGCTCCTGTAAT	gonl-78c	0		GTTTGGATTTCATGGTGCGCT	CTGCTTCCCTTCATCCCCAG
gonl-100c	9	93800352	93800416	deletion	93800352	93800415	0	1	63	3 bp microhomology	paternal	rs1551746(TT/GG/TG) allele T is seen in discordant reads	NHR	Intergenic		Clever	Male	Friesland	25	25	No RepeatFeature	No RepeatFeature	No SD	No SD		gonl-100c			CAGTCATCCGACACACCACA	GGACCGTGCACTGAGAATCA
gonl-110c	1	245514681	245514760	deletion	245514682	245514760	1	0	78	76 bp homology (93% similarity)	unknown	No informative markers	NAHR*	Intron of KIF26B		Clever	Female	Friesland	25	23	trf(trf)	trf(trf)	No SD	No SD		gonl-110c			AGGGTCTGGAAAATGAGCCG	TATGGGTGGGACTTGGACCT
gonl-110c	3	102608656	102608686	deletion	102608656	102608686	0	0	29	2 bp microhomology	maternal	rs11919331(TT/TG/TG) allele G is seen in discordant reads	NHR	Intergenic		Clever, GATK HC	Female	Friesland	25	23	L1MCb(LINE/L1)	L1MCb(LINE/L1)	No SD	No SD		gonl-110c			AAGGTGGCCATCTGTTAGCC	TGAAGCTGTTAGGAGCACGG
gonl-114c	11	76707715	76708022	deletion	76707670	76708039	45	17	306	292 bp homology (85% similarity)	paternal	rs113842907(WT,WT/WT,Del/Del)	NAHR*	Intron of Acer3 gene		123SV	Female	Overijssel	34	38	AluSq(SINE/Alu)	AluSx(SINE/Alu)	No SD	No SD	AGTCTGGTCTCAAACTCCTAACCTCAGGTGATCCACCCACCTCGGCCTCCCAAAGTGCTGGGATTACAGGCGTGAGCCACCACACCCGGCCTCTGTTACTGTTATATAAAG	gonl-114c			CACTCAGCACAACAGGGACA	TGGAGTCAGAGACCAGAGGT
gonl-115c	14	53928420	53932772	deletion	53928331	53932680	89	92	4351	1 bp microhomology	paternal	rs12436222(GA/GG/GA) allele A is seen in discordant reads	NHR	Intron of AL163953.3 lincRNA gene		GSTRiP, mrsFastRD, Pindel	Female	Zuid Holland	29	26	No RepeatFeature	L1M1(LINE/L1)	No SD	No SD	AAGAAGAGAAGTAACAATTATAAACCTCCGGGGCCCTGGTTCCTCTAAATTTTTCCAATTTATTCCCATATAGTCGCTCA	gonl-115c			TGGTGGCGAGGTTTCTC	TGGCTACTATGAGCGACTATATG
gonl-125c	14	41534086	41578638	duplication	41534119	41578643	33	5	44551	1 bp insert	maternal	rs1959905(TT/CC/TCC); rs185658620(GG/AG/AAG)	NHR	Gene desert		123SV, BrD, CNVnator, DWAC-Seq	Female	Noord Holland	31	24	AluSx(SINE/Alu)	No RepeatFeature	No SD	No SD	CATGATCACCACCTTTGCAAAATACTAATTTTCCTTCAAATGCCATAAATGCTGTAATCCCAGCACTTTGGGAGGCTGAGGCTGATCACCTGAGGT	gonl-125c	18		TTCGCCATGTTGTCCAG	TTTCATGATCACCACCTTTG
gonl-133c	15	59858583	59987425	duplication	59858591	59987427	8	2	128841	blunt	paternal	rs34298314(AA/TT/AAT); rs35634961(TT/CC/TTC)	NHR	Duplication of 3 genes: Gcnt3, Gtf2a2, Bnip2		123SV	Female	Utrecht	22	22	L1ME3B(LINE/L1)	MARNA(DNA/Mariner)	No SD	No SD	AAGAGATTGAAAGGTATCCTGCACAGTGGCAGCAGCGTTAGGATGAGTCCTCCTAAGTCTGCCAATGTGTTTAATTTGTCTTTTATCTCCATGGCCAAGATAAGCAAAGCA	gonl-133c			CCAGGCATACAAGGAGCCAA	TGCAGTGTTCAGCATGACCA
gonl-135c	11	112361522	112361558	deletion	112361522	112361558	0	0	35	6 bp microhomology	unknown	No informative markers	NHR	Intergenic		Clever, Pindel, GATK UG, GATK HC	Female	Drenthe	35	31	No RepeatFeature	No RepeatFeature	No SD	No SD		gonl-135c			TCCGTCTTGGGTCTAGAGGG	AGTGGCCCAGACTAGAGAGG
gonl-138c	8	56856063	56859737	deletion	56856080	56859748	17	11	3673	232 bp homology (87% similarity)	paternal	rs62515386(AA/CC/C-)	NAHR	Deletion of 1 exon of Lyn gene		123SV, GSTRiP	Female	Gelderland	39	34	AluSg(SINE/Alu)	AluSq(SINE/Alu)	No SD	No SD	TCAGCTCTACTAAAAGTACAAAAA_TTAGCCGGGTGTGGTGGTGCGTGCCTGTAGTCCCAGCTACTTGGGAGGCTTAAGAAGAAGAATTGCTTGAACCCAGAGGGTGGAGGTTGCAGTGAGCCGAGATTGCACTATTGCACTCCAGTCTGGGCGACAAGAGCGAGGCTCCGTCTCAAAAGAGAAAAACCAAAATGCTACATG	gonl-138c			ACCACCCATAGCCTGCTTTC	CCTCATGGGGCACAAAGGAT
gonl-139c	1	204261136	204261166	deletion	204261135	204261165	1	1	29	blunt	unknown	No informative markers	NHR	Intron of Plekha6 gene		Clever, Pindel	Female	Drenthe	29	27	No RepeatFeature	No RepeatFeature	No SD	No SD		gonl-139c			AGGGAGGGATTACAAAGAGG	GTGCTTTGTGAACCGTAAAG
gonl-139c	13	26309957	26311893	deletion	26309951	26311894	6	1	1935	blunt	paternal	rs75773761(CC/CT/T-); rs7988885(GG/CC/C-)	NHR	Intron of ATP8A2		123SV, BrD, GSTRiP, mrsFastRD, Clever	Female	Drenthe	29	27	Tigger3c(DNA/MER2_type)	dust(dust)	No SD	No SD	GTTGTAATGTCATAGTGCAAATACTTTATTTTTCATAAATTTATCACTGCAAGCTCCACCTCCCAGGTTCATGCCATTCTTC	gonl-139c			AGGAGGATAAGGGAAACAGG	GAGACCATCCTGGCTAACAC
gonl-142c	4,19	59522706	48213211	interchromosomal	59522655		51		N/A	blunt	unknown	No informative markers	MEI/NHR	In lincRNA (Chr 19)		123SV. Mobster	Female	Zuid Holland	25	24	THE1B-int(LTR/MaLR)	AluY(SINE/Alu)	No SD	No SD	TGAACCCGGCAGGTGGAGCTTGCAGTGAGCCGAGATCAGCTGCCACAAAGATCTCTGCCATTCTCTGGAGACATT	gonl-142c			CCAAAGAATCAGGTTATAGAAGTG	GCTGCAGAAATTTGCATAAG
gonl-142c	19,3	48213389	12477733	interchromosomal		12477593		140	N/A	blunt	unknown	No informative markers	MEI/NHR	Immediately after PPARG (Chr 3)		123SV	Female	Zuid Holland	25	24	AluY(SINE/Alu)	No RepeatFeature	No SD	No SD	GTTAGCCAGGATGGTCTCAATCTCCTGATCTTGTGATCTTGAGCTCAGAAAGGTCTCTCCTGAAGGGTTAGG	gonl-142c			CCAAAGAATCAGGTTATAGAAGTG	GCTGCAGAAATTTGCATAAG
gonl-142c	3,4	12477570	59522704	Interchromosomal	12477593	59522655	23	49	N/A	blunt	unknown	No informative markers	MEI/NHR	Intergenic (Chr 4)		123SV	Female	Zuid Holland	25	24	No RepeatFeature	THE1B-int(LTR/MaLR)	No SD	No SD	TTGATATTTTGGCTTGAAAACCTCAAGTCTGCAGGCTACTCCCATCACAGGTCTGGAGGCCTAGGAGGAAAAAGTG	gonl-142c			CCAAAGAATCAGGTTATAGAAGTG	GCTGCAGAAATTTGCATAAG
gonl-146c	18	7716672	8043627	deletion	7716603	8043635	69	8	326954	18 bp insert	maternal	rs146413142(GA/AA/G-); rs35092107(AA/GG/A-)	NHR	Deletion of 6 exons of PTPRM gene		123SV, mrsFastRD	Female	Friesland	28	28	L1P3(LINE/L1)	LTR79(LTR/ERVL)	No SD	No SD	AAAACAGCCCCATCAAAAAGTGGGAAAAAGATTCCCACTACCATGGAGAAGCTTCCATGGAGAAGTCAGGGCCACCTCCCCAA	gonl-146c			GAGGCATGGGCAGAGAC	TGCACAGATCAAGGGTGAC
gonl-146c	18	8245413	8246966	deletion	8245383	8246982	30	16	1552	3 bp microhomology	maternal	rs11661288(TT/TG/TG) allele G is seen in discordant reads; rs34228064(WT,WT/WT,Del/WT,Del) allele Del is seen in discordant reads	NHR	Intron of PTPRM gene		123SV, BrD, GSTRiP, mrsFastRD, Clever, Pindel	Female	Friesland	28	28	No RepeatFeature	No RepeatFeature	No SD	No SD	CAATGGGCAGGGCAGCACTGTTGCTTTCATCCTTGATCAAACAGATCATGTAACTAATCAGAGGAGTTACAATTTAGACTTA	gonl-146c			GCTTTGCGTTTCTCGTACAC	CATGGATGACAGAGCCTTG
gonl-153c	12	121996522	121996659	deletion	121996514	121996716	8	57	136	117 bp homology (89% similarity)	unknown	No informative markers	NAHR*	Intron of KDM2B gene		123SV	Male	Utrecht	29	29	AluSx(SINE/Alu)|trf(trf)	trf(trf)|AluSq/x(SINE/Alu)	No SD	No SD	GCCTCAGCCTCCCAAGTAGCTGGGACTACAGGCGCATGCCACCGTGCCCCAGCTAATTTTTGTATTTTTAGTAGAGATGGGGTTTAGCCATGTTGGCCAGG	gonl-153c	0		CATGAAGCCCCACCTGGAAT	CAAAGTAGCGGAGGCCAAGA
gonl-156c	8	103345090	103384830	deletion	103345066	103384934	24	104	39739	3bp microhomology	paternal	rs71518860(AA/GG/G-);	NHR	Deletion of 8 exons of UBR5 gene		123SV, Pindel	Male	Noord Brabant	33	32	L2c(LINE/L2)	No RepeatFeature	No SD	No SD	CCACTGAATTCCTTGTAGAAAGGCCAATATCATACTCATGACTATATTACCATATGCCAGCTTTTTTAATGTGAACTTCTAACTATTCCCCTTAGTT	gonl-156c			TCTCCTCTGCGATGCCTTTG	CAAATGGCCCCAGTAGTTTGG
gonl-156c	21	15233439	15252761	deletion	15234449	15252499	1010	262	19321	12182 bp homology (92% similarity)	paternal	rs3115488(AA/GA/G-); rs4046480(CC/CT/T-)	NAHR	Intergenic		DWAC-Seq	Male	Noord Brabant	33	32	MSTA-int(LTR/MaLR)	MSTA(LTR/MaLR)	SD	SD	GATTGCCAAGACATTAGGGAGAAGGCCTTGAAGACACTTAATAGATCCACTTTGCAGTCATAATTTTCTCAATGATCATAAAGAAAAGAGGTTTAATTGG	gonl-156c			validation based on SNP genotype within deletion interval
gonl-158c	14	102307326	102307398	deletion	102307326	102307399	0	1	71	1 bp microhomology	unknown	No informative markers	NHR	Intron of PPP2R5C		Clever, Pindel	Female	Friesland	26	24	No RepeatFeature	MIR(SINE/MIR)	No SD	No SD		gonl-158c			ATGTTGCTTCCGTTGGTTGC	CTCAAGGCACAGCACTCTGA
gonl-171c	1	96031562	96031572	AluY insertion	96031545	96031545	17	27	>55	undetermined	unknown	No informative markers	MEI	Intergenic		Mobster	Male	Friesland	26	24	L1ME1(LINE/L1)	L1ME1(LINE/L1)	No SD	No SD		gonl-171c			AGGTCTTTTTAATTTCCCACAACA	CCTGACCTCATGATCCACCC
gonl-197c	2	14500305	14500334	deletion	14500305	14500335	0	1	28	28 bp homology (93% similarity)	unknown	No informative markers	NAHR*	Intron of LincRNA LINC00276		Clever	Male	Zuid Holland	27	25	MER45A(DNA/Tip100)	MER45A(DNA/Tip100)|trf(trf)	No SD	No SD		gonl-197c			CACACCAAACCCCCAAGTCA	ATGCCAAAATGCAAAGGCTGT
gonl-197c	6	104045533	104045550	AluY insertion	104045533	104045533	0	17	>171	16bp TSD	paternal	rs9404436(GA/AA/GA) allele G is seen in discordant reads, rs9391073(GT/GG/GT) allele T is seen in discordant reads	MEI	Intergenic		Mobster	Male	Zuid Holland	27	25	L2(LINE/L2)	L2(LINE/L2)	No SD	No SD		gonl-197c			CCAGGATCTTGAGGGCCTTG	CCGGCTAAAACGGTGAAACC
gonl-200c	8	5304013	5331950	duplication	5304061	5331777	48	173	27936	9 bp insert	paternal	rs77028052(GG/GA/GGA); rs183887596(TT/TG/TTG)	NHR	Gene desert		123SV, BrD	Female	Limburg	27	27	L1MD3(LINE/L1)	L2(LINE/L2)	No SD	No SD	GGTTAAATTCTTTCTTGCCTACTCATTTCATTCATCAGTTTGTCATCGAAAACTGACACCAGCGTTTAAATAGAAAGGCAAA	gonl-200c	20		TTGGTCCTTCAACTTTGTTC	TCTACTGTCTGCATGATCTGTG
gonl-200c	11	42245882	42253302	duplication	42245883	42253411	1	109	7419	blunt	paternal	rs7480010(GG/GA/GGA);	NHR	Intron of CTD-2572N17.1 lincRNA gene		123SV	Female	Limburg	27	27	No RepeatFeature	No RepeatFeature	No SD	No SD	TTTTGTAATTTGTTTGTATTTGTTTCTACATGTGGCCCTCTGACTTCCAGGGAGAAAATTGCTTGACTAGGTGAGAAGCAAG	gonl-200c	1		TGCTTCTCACCTAGTCAAGC	TACCACCACCAGCAATGAC
gonl-200c	2	228467932	228467962	deletion	228467928	228467966	4	4	29	blunt	paternal	rs7566305(GC/GG/GC) allele C is seen in discordant reads	NHR	Intergenic		Clever, GATK HC	Female	Limburg	27	27	AluSp/q(SINE/Alu)	AluSp/q(SINE/Alu)	No SD	No SD		gonl-200c	0		AGACTGCACTGCACCATACC	AGATGATAGCGGGCATGGTG
gonl-204c	7	87860030	87860057	deletion	87860030	87860056	0	1	26	(CA)n repeat instability	paternal	rs10952916(GA/GG/GA) allele A is seen in discordant reads	VNTR	Intergenic		Pindel	Male	Zuid Holland	36	36	No RepeatFeature	dust(dust)|trf(trf)	No SD	No SD		gonl-204c			CAAATCGCCTCCCAGGAAGT	AAAGTGTGGCATCAAACCGC
gonl-206c	8	42309607	42310247	duplication	42309625	42310165	18	82	639	TGG(AGG)n repeat instability at breakpoint, deletion length is approximate, judged from distance between paired reads	paternal	rs200871440(WT,Del/WT,WT/WT,Del) Del allele is seen in discordant reads	VNTR	Intron of SLC20A2 gene		123SV	Male	Zeeland	20	19	dust(dust)|trf(trf)	MER5A(DNA/MER1_type)	No SD	No SD	TGGAGGAGGGGAGGAAGAGATGAAGAGGAGGAGGAGGAAGAGATGAAGAGGAGGAGGAAGAGATGAAAGAGGAGGAGGAAAAGATGGAGGAGGAAGAGGAAGAGATGAAGAGGAGGAGGAAGAGATGAAGAGGAAGAGGAGGAAGAGAGGGGGAGGAAGAGATGAAAGAGGAGGAGGAAAAGATGGAGGAGGAAGA	gonl-206c	0		CCTCCACTTCATTTCTTCCTCCT	GGAGGAGCAGGAAGAGATGG
gonl-221c	10	98065914	98067176	deletion	98065770	98067194	144	18	1261	286 bp homology (86% similarity)	maternal	rs181175637(GA/GG/A-);	NAHR	Intron of Dntt gene		123SV, GSTRiP	Male	Friesland	30	30	AluSc(SINE/Alu)	AluSc(SINE/Alu)	No SD	No SD	CAGGAAGATTATATAGGTAAAGAAGCCAAAAAAATAGATTTTTTTTTTTTTTTTTTTGAGACAGAGTCTTGCTCTGTTGCCCGGGTTGGAGTGCAGTGGCACAATCTCGGCTCACTGCAACCTCCACCTCCCAGGTTCAAGCGATACTCCTGCCTAAGCCTCCTGAACAGC	gonl-221c			GCTGCCTCTCTGTAACCTCC	TATATTGGAGGCCAGGCACG
gonl-236c	6	142833356	142833364	AluY insertion	142833348	142833348	8	16	324	7bp TSD	unknown	No informative markers	MEI	Intergenic		Mobster	Male	Zuid Holland	28	22	LINE/L1	LINE/L1	No SD	No SD		gonl-236c			TGTTGCCAAGTTGCTCTCTT	AGTCCGCAGTCCGACCTG
gonl-239d	12	55432615	55432631	AluY insertion	55432615	55432615	0	16	>151	undetermined	paternal	rs2633413(TC/CC/TC) allele T is seen in clipped paired reads, rs2633412(TC/TT/TC) allele C is seen in clipped paired reads	MEI	Intergenic		Mobster	Female	Overijssel	29	28	No RepeatFeature	No RepeatFeature	No SD	No SD		gonl-239d			GGACTCTAGGCAGTTGCTGT	CAGTCCGGCCTGTGTTACAG
*These variants show extensive homology at the breakpoints, but since they are very small they may have resulted from homology-driven replication slippage rather than NAHR

## Sheet: indels
Public_ID	CHROM	START	END	Reference Allele	Mutated Allele	Type	Size	Repeat unit	nReference/nMutated Repeats	Reference repeat tract length	Microhomology length	Haplotype	nReads Paternal Haplotype	nReads Maternal Haplotype	Class	Mechanism	Gene Overlap	Method	Sex	Province	AgeDiffFather	AgeDiffMother	Longest overlapping palindrome	Longest non-overlapping palindrome	Overlap with dbSNP	dbSNP Allele Frequency	Forward Primer	Reverse Primer
gonl-102c	1	217847741	217847744	TAGG	T	deletion	-3	AGG	3.2	9	3	NA	NA	NA	NR, CCC	polymerase slippage	INTRON	pbt/pindel/ug/hc	M	Friesland	32	31	NA	0	NA	NA	GCCTCAACCTTGTTGCTG	CACCTAGAGTGGCTGCAAG
gonl-102c	2	164875949	164875953	TTTTA	T	deletion	-4	TTTA	2.1	11	4	NA	NA	NA	TR	polymerase slippage	NA	pbt/ug/hc	M	Friesland	32	31	NA	0	NA	NA	TGACTTGACTTAGACACACTGC	AAGCTATGAGGATGCAAATG
gonl-102c	11	106845486	106845490	CAGAG	C	deletion	-4	AG	4.2	9	4	NA	NA	NA	TR	polymerase slippage	INTRON	pbt/hc	M	Friesland	32	31	NA	0	NA	NA	ATTGTGGAATCAGTGGCATC	TGTGGGTGTTTCAGTTGTTG
gonl-110c	7	141409156	141409157	GA	G	deletion	-1	A	6.5	6	1	NA	NA	NA	HR	polymerase slippage	INTRON	pbt/pindel/ug/hc	F	Friesland	25	23	NA	0	NA	NA	ACTCCAGTGTCACACCCTCT	ACGATGCAACAGGACACCAA
gonl-114c	4	91938901	91938902	TC	T	deletion	-1	NA	NA	NA	0	NA	NA	NA	NR, non-CCC	NHEJ	INTRON	pbt/pindel/ug/hc	F	Overijssel	34	38	NA	0	NA	NA	GGGTTTGTGGTGCAGAG	TTAAATACCACTCCGGAAGC
gonl-115c	13	35751686	35751686	A	AGGTATCT	insertion	7	GGTATCT	1.2	7	NA	NA	NA	NA	NR, CCC	polymerase slippage	INTRON	pbt/ug/hc	F	Zuid_Holland	29	26	NA	0	NA	NA	GTTGCTTGCATACTAAGAATAGGAC	AACCATGTTAAGAGATGCTGTC
gonl-116c	3	3858098	3858099	CA	C	deletion	-1	A	4.3	4	1	NA	NA	NA	NR, CCC	polymerase slippage	NA	pbt/ug/hc	F	Utrecht	29	27	NA	8	NA	NA	TGTTCTCAGCTGTTCCTTTG	TCTGTTTGACTGAAGGTTTCC
gonl-116c	3	81501175	81501176	TG	T	deletion	-1	G	5.4	5	1	NA	NA	NA	NR, CCC	polymerase slippage	NA	pbt/ug/hc	F	Utrecht	29	27	NA	0	NA	NA	GAGCTTGTTTCATAGCCTGAC	TGATCTTCAAAGCACACCTC
gonl-116c	10	116150838	116150839	TC	T	deletion	-1	NA	NA	NA	0	NA	NA	NA	NR, non-CCC	NHEJ	INTRON	pbt/ug	F	Utrecht	29	27	NA	0	NA	NA	CCTGCCTCTGATGACTAAAG	AGCCTGGGTGACAGAAAG
gonl-116c	11	46269665	46269665	G	GT	insertion	1	T	1.2	1	NA	NA	NA	NA	NR, CCC	polymerase slippage	NA	pbt/pindel/ug	F	Utrecht	29	27	NA	0	NA	NA	TGTTGACAATGAAGCAGTGG	GAGAATCGCTTGAATCTGG
gonl-116c	12	51860452	51860456	GCAAT	G	deletion	-4	NA	NA	NA	2	NA	NA	NA	NR, non-CCC	NHEJ	INTRON	pbt/pindel/ug/hc	F	Utrecht	29	27	6	0	NA	NA	ATGCTCCAGAGCCTAGTGAC	CCTAGACACAGGAGGACAGG
gonl-116c	13	86334409	86334410	CA	C	deletion	-1	NA	NA	NA	0	NA	NA	NA	NR, non-CCC	NHEJ	NA	pbt/pindel/ug/hc	F	Utrecht	29	27	NA	0	NA	NA	CAAGAAGGATTTGCCAATAG	AGTGGTTGCAGGAGAGTCTG
gonl-116c	13	103836884	103836886	CTG	C	deletion	-2	TG	3.2	7	2	mother	0	1	NR, CCC	polymerase slippage	NA	pbt/ug/hc	F	Utrecht	29	27	NA	0	NA	NA	GGGCCCAGAATAAAGGTG	CATGCAGAAGATCACATTGC
gonl-118c	1	82376602	82376602	G	GC	insertion	1	C	6.7	6	NA	father	2	0	HR	polymerase slippage	INTRON	pbt/ug/hc	F	Zuid_Holland	30	29	NA	NA	NA	NA	GGGCATCTTTATTAGAATTTTCC	GAACAGGAAATAGAAAATGGAG
gonl-118c	3	144409220	144409222	GAT	G	deletion	-2	NA	NA	NA	0	NA	NA	NA	NR, non-CCC	NHEJ	NA	pbt/pindel/ug/hc	F	Zuid_Holland	30	29	NA	0	NA	NA	TCCCAGTCTTGGGTACTTTG	TTTCAACTTTGTTAAATTGTCC
gonl-118c	5	61615285	61615286	TA	T	deletion	-1	A	2.1	2	1	father	5	0	NR, CCC	polymerase slippage	INTRON	pbt/pindel/ug/hc	F	Zuid_Holland	30	29	NA	0	NA	NA	TTCAGGCATGTAGGTTTGAC	CAGTGAAAGAGAAGCTGGAAG
gonl-120c	2	95765017	95765020	CATT	C	deletion	-3	NA	NA	NA	0	father	3	0	NR, non-CCC	NHEJ	INTRON	pbt/ug/hc	M	Zeeland	38	31	NA	0	NA	NA	GTTCCACCTCCCAGGTTC	CACACCAGGATTCAAAGACC
gonl-120c	3	25733985	25733986	CA	C	deletion	-1	NA	NA	NA	0	NA	NA	NA	NR, non-CCC	NHEJ	NA	pbt/ug/hc	M	Zeeland	38	31	NA	0	NA	NA	AGTGAGAGGAGGAAGGAAGG	AGATGCTGGCGAGGTTG
gonl-120c	8	36423175	36423178	TATA	T	deletion	-3	ATA	3.2	9	3	NA	NA	NA	NR, CCC	polymerase slippage	NA	pbt/pindel/ug/hc	M	Zeeland	38	31	NA	0	NA	NA	GACTTGGAAATTTAGAAAGTGAAAG	GAAGAAATTGAATCGTTAATGC
gonl-121c	13	79394241	79394242	AC	A	deletion	-1	C	2.1	2	1	NA	NA	NA	NR, CCC	polymerase slippage	NA	pbt/ug/hc	F	Limburg	30	29	NA	0	NA	NA	TGCGATCTGAGTGGGTAGGA	ACAGTCATGCATGCCTTCCA
gonl-121c	20	2209559	2209560	GC	G	deletion	-1	NA	NA	NA	0	father	2	0	NR, non-CCC	NHEJ	NA	pbt/hc	F	Limburg	30	29	NA	0	NA	NA	TTGCTGTTCTAGTGGGTGGG	CTCACCCCTTCGGCAAGAAT
gonl-121c	21	34947756	34947759	GAGA	G	deletion	-3	AGA	2.1	6	3	NA	NA	NA	TR	polymerase slippage	INTRON	pbt/pindel/ug/hc	F	Limburg	30	29	NA	0	NA	NA	CACTGTGCCTGGCCATACTT	AACGTGCTCTCACCTGACAG
gonl-121c	X	84746107	84746107	G	GA	insertion	1	A	3.4	3	NA	NA	NA	NA	NR, CCC	polymerase slippage	NA	pindel	F	Limburg	30	29	NA	0	NA	NA	CCCACTGGGTTTAGAGGCTG	CAGAGTGAGGGATGCACAGG
gonl-121c	X	137789154	137789156	CTA	C	deletion	-2	NA	NA	NA	1	NA	NA	NA	NR, non-CCC	NHEJ	INTRON	pindel	F	Limburg	30	29	NA	0	NA	NA	CCTCAATGGCAAAGCTGAGC	TAGGGGATGTAAGCTGCCCT
gonl-124c	2	121791884	121791887	ATCT	A	deletion	-3	TCT	3.2	10	3	mother	0	6	TR	polymerase slippage	NA	pbt/pindel/ug/hc	M	Zuid_Holland	29	28	NA	0	NA	NA	AGCATCCAGGAGGTATTGTC	CATCAGTCTACATGCTGAAACC
gonl-124c	4	160777093	160777094	AC	A	deletion	-1	C	2.1	2	1	NA	NA	NA	NR, CCC	polymerase slippage	NA	pbt/ug/hc	M	Zuid_Holland	29	28	NA	6	NA	NA	CCCCCTCATTCACACGCTAA	TGGGGAAATGTATACAGACCATCA
gonl-124c	7	50108816	50108816	G	GA	insertion	1	A	1.2	4	NA	NA	NA	NA	NR, CCC	polymerase slippage	INTRON	pbt/ug	M	Zuid_Holland	29	28	NA	0	NA	NA	TAGGTGCTAAAGCTCGACTG	ACGCCAAGAGAAACTAGCTG
gonl-124c	11	24779708	24779710	CTA	C	deletion	-2	NA	NA	NA	0	father	2	0	NR, non-CCC	NHEJ	INTRON	pbt/ug/hc	M	Zuid_Holland	29	28	NA	0	NA	NA	ACTCTCATCTCGTTATGTGAGCA	GCCCCAATTTGAGAGAGAGCA
gonl-124c	14	61040808	61040810	GAA	G	deletion	-2	A	3.1	3	1	NA	NA	NA	NR, CCC	polymerase slippage	NA	pbt/hc	M	Zuid_Holland	29	28	NA	0	NA	NA	GCAAATCTGAGATCCAGTCC	CACCTATTATGAAACAGCTTGG
gonl-125c	2	228554844	228554849	TAAGTCCTTAC	TTTAGT	complex	-5	NA	NA	NA	0	NA	NA	NA	Complex	SD-MMEJ/TMEJ	INTRON	NA	F	Noord_Holland	31	24	8	0	NA	NA	GCAGGAGGACAAAGCTACAC	TGACCTGTGTCTCTTACAGTTTC
gonl-125c	4	2477791	2477792	TA	T	deletion	-1	NA	NA	NA	0	NA	NA	NA	NR, non-CCC	NHEJ	NA	pbt/pindel/hc	F	Noord_Holland	31	24	NA	0	NA	NA	ACTGGGAGATCAGGGTCAC	GTGCAGGTAACACAGAATGC
gonl-125c	20	20405141	20405145	GAGGA	G	deletion	-4	NA	NA	NA	3	NA	NA	NA	NR, non-CCC	NHEJ	INTRON	pbt/pindel/ug/hc	F	Noord_Holland	31	24	NA	0	NA	NA	CTTCTGCAAATCACCAAGTG	GCTGCACCCATTAACTCATC
gonl-129c	1	228069927	228069928	GC	G	deletion	-1	C	4.3	4	1	NA	NA	NA	NR, CCC	polymerase slippage	NA	pbt/pindel/ug/hc	F	Limburg	29	27	NA	0	NA	NA	CCTGAAAGAGCATGTCAAAG	ACTGCAGCCCTGACCTC
gonl-129c	5	107381623	107381625	ATG	A	deletion	-2	TG	2.1	4	2	NA	NA	NA	NR, CCC	polymerase slippage	INTRON	pbt/pindel/ug/hc	F	Limburg	29	27	NA	0	NA	NA	TTGTATTTTCATGTCAATTTAGTCC	TTAGACATAGCCATCCTAAATG
gonl-129c	7	23646302	23646303	CT	C	deletion	-1	NA	NA	NA	0	father	5	0	NR, non-CCC	NHEJ	NA	pbt	F	Limburg	29	27	NA	0	NA	NA	GGAGAGGAGTCTGGCAAACC	TGGTCTCACGTGATCCTCCT
gonl-129c	8	13976867	13976871	CTGTT	C	deletion	-4	NA	NA	NA	3	NA	NA	NA	NR, non-CCC	NHEJ	INTRON	pbt/pindel/ug/hc	F	Limburg	29	27	NA	0	NA	NA	CCATTTGTTTGTGGCCCCTC	CTGAAAGCAGCATTCCCTTCA
gonl-129c	12	6930392	6930394	AGT	A	deletion	-2	GT	5.4	10	2	NA	NA	NA	TR	polymerase slippage	NA	pbt/pindel/hc	F	Limburg	29	27	NA	0	NA	NA	GATGAAGTTTCCCTGGAGAG	CTTCATTGGTGAAATGGTTC
gonl-129c	12	73602467	73602467	G	GCT	insertion	2	CT	1.2	2	NA	NA	NA	NA	NR, CCC	polymerase slippage	NA	pbt/ug/hc	F	Limburg	29	27	NA	0	NA	NA	TGCAATCTGGAGTTTGAGACC	TCACATTCAGCAGCCGAGTT
gonl-129c	17	72461412	72461414	GGT	G	deletion	-2	GT	3.2	7	2	NA	NA	NA	TR	polymerase slippage	NA	pindel	F	Limburg	29	27	NA	0	NA	NA	TGTGAATGTGTGAGTGTATTTCAG	ACAAACAAACACGTTCATGC
gonl-129c	18	64217625	64217628	CAGA	C	deletion	-3	AGA	2.1	8	3	NA	NA	NA	NR, CCC	polymerase slippage	INTRON	pbt/pindel/hc	F	Limburg	29	27	NA	0	NA	NA	CTCTTTTCTTTGTTCCATGC	GCTCTTGATTTAGCCCACAC
gonl-129d	2	150601768	150601772	ATTCT	A	deletion	-4	NA	NA	NA	2	NA	NA	NA	NR, non-CCC	NHEJ	NA	pindel/ug/hc	M	Limburg	29	27	NA	0	NA	NA	ATGGCATGACTAAGCATTTG	CGAGAACATTGGGACTTTAAC
gonl-129d	6	106030032	106030032	T	TA	insertion	1	A	9.1	9	NA	NA	NA	NA	HR	polymerase slippage	NA	ug/hc	M	Limburg	29	27	NA	0	NA	NA	GAGCCCATCAAGTTTGGA	AGACTCACTAGAGTGCTTGGT
gonl-129d	12	45023981	45023982	TG	T	deletion	-1	NA	NA	NA	0	NA	NA	NA	NR, non-CCC	NHEJ	INTRON	ug/hc	M	Limburg	29	27	NA	0	NA	NA	TCACATGTTGGTTGGTTACA	GATTAGTTCAATTCAGAGCTTCTT
gonl-129d	14	57867388	57867388	G	GT	insertion	1	T	7.8	7	NA	NA	NA	NA	HR	polymerase slippage	INTRON	pindel/ug/hc	M	Limburg	29	27	NA	0	NA	NA	ATCCTACTGCACGGTGTTTC	CAGGAGCTGGAGTGGTCTC
gonl-129d	19	54054922	54054923	GT	G	deletion	-1	T	3.2	3	1	NA	NA	NA	NR, CCC	polymerase slippage	NA	ug/hc	M	Limburg	29	27	NA	9	NA	NA	AGTTTGTGAAAGGCATCCAG	GAGCCATCCCTCAGTATCC
gonl-12c	1	206120620	206120621	GC	G	deletion	-1	NA	NA	NA	0	NA	NA	NA	NR, non-CCC	NHEJ	NA	pbt/ug	F	gelderland	26	27	NA	0	NA	NA	TGCCAGGTTGAAATTAGCTC	CCTCGGACAGTTCTTCAGTG
gonl-131c	1	210598462	210598462	T	TC	insertion	1	C	4.5	4	NA	NA	NA	NA	NR, CCC	polymerase slippage	INTRON	pbt/ug/hc	F	Zeeland	25	24	NA	0	NA	NA	GGAATTGCCACACTGTCTTC	AAAGACTTCATGACGAAGAGG
gonl-131c	4	186307656	186307658	CAG	C	deletion	-2	AG	3.2	6	2	NA	NA	NA	NR, CCC	polymerase slippage	NA	pbt/pindel/ug/hc	F	Zeeland	25	24	NA	0	NA	NA	AGCATATCTTTCATAGCCAGTG	CTGCTGGAGGGTGTAGTCTC
gonl-131c	9	26799774	26799776	ATC	A	deletion	-2	TC	2.1	4	2	NA	NA	NA	NR, CCC	polymerase slippage	NA	pbt/pindel/ug/hc	F	Zeeland	25	24	NA	0	NA	NA	GCAGTGAGCTGAAATCACG	GGCCAAGTGGTGTTTAATG
gonl-131c	12	80144471	80144475	TAGTG	T	deletion	-4	NA	NA	NA	2	NA	NA	NA	NR, non-CCC	NHEJ	NA	pbt/pindel/ug/hc	F	Zeeland	25	24	NA	0	NA	NA	ACAGGTGAAGGAATCTCAGG	CATTGTCTTCTGATCTCCATTG
gonl-131c	17	59832091	59832094	CTCT	C	deletion	-3	TCT	2.1	7	3	NA	NA	NA	NR, CCC	polymerase slippage	INTRON	pbt/pindel/ug/hc	F	Zeeland	25	24	NA	0	NA	NA	TCTAAATGAGCACCCTCCAG	CCCAGTGTGGTTATATTTGG
gonl-133c	4	158407207	158407208	TG	T	deletion	-1	NA	NA	NA	0	father	2	0	NR, non-CCC	NHEJ	NA	pbt/ug	F	Utrecht	22	22	NA	0	NA	NA	GGATATGTGGGCCCTTTG	TGGATCCAAGATCAGGAGAC
gonl-133c	5	104736291	104736293	TAA	T	deletion	-2	A	3.1	3	1	NA	NA	NA	NR, CCC	polymerase slippage	NA	pbt/ug/hc	F	Utrecht	22	22	NA	0	NA	NA	AGTAGCTGCTTTGTAGATTTGG	AGAGTTCAGTTACAATCACCTCTC
gonl-133c	8	79650210	79650223	ATTTGGTTTTGTTG	A	deletion	-13	NA	NA	NA	3	NA	NA	NA	NR, non-CCC	NHEJ	INTRON	pindel	F	Utrecht	22	22	NA	0	NA	NA	TGGGAAACTACTAGTGCTCAAAC	TATGTACACATTTACAAGAACTCC
gonl-133c	11	68520739	68520742	AAAC	A	deletion	-3	AAC	4.3	14	NA	mother	NA	NA	TR	polymerase slippage	NA	NA	F	Utrecht	22	22	NA	0	NA	NA	ACATGGTGAAACCCTGTCTC	CATCTAGGAGCAGCAGGTG
gonl-135c	3	75086029	75086032	AATG	A	deletion	-3	NA	NA	NA	2	NA	NA	NA	NR, non-CCC	NHEJ	NA	pbt/pindel/ug/hc	F	Drenthe	35	31	NA	0	NA	NA	TTCAGCCCTTGTTCTCCACC	ACAGGTGGCCAAGAAACACA
gonl-138c	2	65669102	65669102	G	GTGA	insertion	3	TGA	2.3	8	NA	NA	NA	NA	TR	polymerase slippage	NA	pbt/ug/hc	F	gelderland	39	34	NA	0	NA	NA	AAATAGGCATGCTACTGAAGAG	TAGATGGACCACAGGGAAAC
gonl-138c	4	182667786	182667792	TGTATAA	T	deletion	-6	NA	NA	NA	4	NA	NA	NA	NR, non-CCC	NHEJ/hairpin loop	NA	pbt/pindel/ug/hc	F	gelderland	39	34	NA	7	NA	NA	GGTCTGCAGATGATTACAAAG	TAAACAGGGAGGAAGCAATG
gonl-138c	9	100747900	100747901	CG	C	deletion	-1	NA	NA	NA	0	NA	NA	NA	NR, non-CCC	NHEJ	INTRON	pbt/ug/hc	F	gelderland	39	34	NA	0	NA	NA	GCGTTCTTCCGACCTTC	TGGGCAAGAGAGAGACTCAG
gonl-138c	18	27568837	27568837	C	CA	insertion	1	A	4.5	4	NA	NA	NA	NA	NR, CCC	polymerase slippage	NA	pbt/ug/hc	F	gelderland	39	34	NA	0	NA	NA	GGTCCGTAGCAATTTTGAAG	TGAACTTTGTGTTTTCTATGTTTTC
gonl-138c	20	34269974	34269976	CTT	C	deletion	-2	NA	NA	NA	0	NA	NA	NA	NR, non-CCC	NHEJ	INTRON	pbt/pindel/ug/hc	F	gelderland	39	34	NA	0	NA	NA	CAGGGATAAGCCATGATACTC	GGGATAAATGCCCAAGTG
gonl-138c	X	66203935	66203935	C	CT	insertion	1	T	3.4	3	NA	NA	NA	NA	NR, CCC	polymerase slippage	NA	pindel	F	gelderland	39	34	NA	0	NA	NA	TTCCACTGAGAAGTCTGTTGTC	AATCCTAGGGTTGAAATAGGC
gonl-139c	15	30255721	30255724	GATT	G	deletion	-3	ATT	2.1	7	3	NA	NA	NA	NR, CCC	polymerase slippage	NA	pbt/pindel/ug/hc	F	Drenthe	29	27	NA	0	NA	NA	TGGAGAAACAACCTTCTATCG	AGTGAGCCGAGATCATGC
gonl-13c	1	168934561	168934563	ATT	A	deletion	-2	T	3.1	3	1	NA	NA	NA	NR, CCC	polymerase slippage	NA	pbt/hc	F	Limburg	26	24	NA	0	NA	NA	ATCCCAAAACTTAGGGAAGG	AAGCCTACTCTCGGGGATAC
gonl-13c	8	104605269	104605270	AC	A	deletion	-1	NA	NA	NA	0	NA	NA	NA	NR, non-CCC	NHEJ	INTRON	pbt/pindel/ug/hc	F	Limburg	26	24	NA	0	NA	NA	TTGACTTAAGGTCTTTAATGAAGC	ACATTGGTCAGCTGGAAGAC
gonl-13c	11	65939317	65939318	TGG	TC	complex	-1	NA	NA	3	1	NA	NA	NA	Complex	NA	INTRON	NA	F	Limburg	26	24	NA	0	NA	NA	ATCTCGGCTCACTGCAAG	GGTGGGAGGAACTGACTG
gonl-140c	8	34676754	34676754	T	TA	insertion	1	A	1.2	1	NA	father	3	0	NR, CCC	polymerase slippage	NA	pbt/pindel/ug/hc	M	Overijssel	36	34	NA	0	NA	NA	AGGGAAGTCAGGCAAAGCAA	TCCAGTCCTATCTCAGCCCT
gonl-143c	4	135216984	135216985	AG	A	deletion	-1	NA	NA	NA	0	NA	NA	NA	NR, non-CCC	NHEJ/hairpin loop	NA	pbt/pindel/ug/hc	F	Noord_Holland	28	27	NA	6	NA	NA	TTCAGCCATAGTATTGGAAGG	AGACTGTGGGATGTGTTTCC
gonl-143c	5	41956749	41956749	A	AT	insertion	1	T	8.9	8	NA	NA	NA	NA	HR	polymerase slippage	NA	pbt/hc	F	Noord_Holland	28	27	NA	NA	rs199803662	0.007	TGTTGAACTTGAAGATGCAG	AGTGGTGTGTGCCTGTAATC
gonl-143c	8	53483750	53483754	CAGAT	C	deletion	-4	AGAT	4.3	16	4	father	12	0	TR	polymerase slippage	NA	pbt/ug/hc	F	Noord_Holland	28	27	NA	NA	NA	NA	CTAAACAGTTCATGCCAAGG	TCCCAGCCTACATCTTTCTC
gonl-150c	3	6152882	6152885	TTGG	T	deletion	-3	NA	NA	NA	2	NA	NA	NA	NR, non-CCC	NHEJ	NA	ug/hc	M	Overijssel	27	20	NA	0	NA	NA	CAGAAACCTAGATGGCATAGC	AAGTGAGAGTGAAATGCCAAG
gonl-150c	4	38904045	38904045	C	CA	insertion	1	A	1.2	1	NA	NA	NA	NA	NR, CCC	polymerase slippage	INTRON	pbt/pindel/ug/hc	M	Overijssel	27	20	NA	0	NA	NA	ATTTCACCTCACCAGGTCTC	CTCTACTCTTTGGCTCACTGC
gonl-150c	13	74678592	74678595	AAAG	A	deletion	-3	NA	NA	NA	0	father	2	0	NR, non-CCC	NHEJ/hairpin loop	NA	pbt/pindel/ug/hc	M	Overijssel	27	20	NA	6	NA	NA	TTTCTAGACAGTTTTGAGTAGTGC	GAAGTTGTCAGATTTAATTTGGAG
gonl-150c	14	43168840	43168844	CAATT	C	deletion	-4	NA	NA	NA	2	mother	0	3	NR, non-CCC	NHEJ	NA	pbt/pindel/ug/hc	M	Overijssel	27	20	NA	0	NA	NA	TGAGAGAAAATATCTGTTAGGTAAGAC	ACAAATGACATGCCAGTGAG
gonl-153c	12	62030612	62030612	G	GT	insertion	1	T	6.7	6	NA	NA	NA	NA	HR	polymerase slippage	NA	pbt/ug	M	Utrecht	29	29	NA	0	rs540061825	0.001	ACTTCTCTGTCCTTGGCATC	GTTGTGGACAGCCAATTTC
gonl-156c	3	173045783	173045788	CTTTAA	C	deletion	-5	NA	NA	NA	0	father	8	0	NR, non-CCC	NHEJ	NA	pbt/pindel/ug/hc	M	Noord_Brabant	33	32	NA	0	NA	NA	TTTCAGGTTCCACCCACACG	TGATAGCCCCTCACACCCAT
gonl-156c	5	171694162	171694162	C	CT	insertion	1	T	1.2	1	NA	NA	NA	NA	NR, CCC	polymerase slippage	INTRON	pbt/pindel/ug/hc	M	Noord_Brabant	33	32	NA	NA	NA	NA	CACCACTGCACTCCACTAGG	TGCATCTGAGCTTGCTGTGA
gonl-158c	6	7326869	7326869	C	CA	insertion	1	A	6.7	6	NA	NA	NA	NA	HR	polymerase slippage	NA	pbt/hc	F	Friesland	26	24	NA	6	NA	NA	TGAAGAATCTGCCTGCCTGG	AGGCTTACTTTGCACCCCTT
gonl-158c	9	105647370	105647373	TAAGG	TT	complex	-3	NA	NA	NA	0	NA	NA	NA	Complex	NA	NA	NA	F	Friesland	26	24	NA	0	NA	NA	GCCAGTCATATCCTGCCCTC	AGGTTAGTGCATTGCCTCCC
gonl-163c	1	63948721	63948724	TAGA	T	deletion	-3	NA	NA	NA	2	NA	NA	NA	NR, non-CCC	NHEJ	INTRON	pbt/pindel/ug/hc	F	Zuid_Holland	34	34	NA	0	NA	NA	GGCCAGGCTAATCTCAAAC	TTTCATGGAAGGGCTTATG
gonl-163c	1	117861057	117861058	AG	A	deletion	-1	NA	NA	NA	0	NA	NA	NA	NR, non-CCC	NHEJ	NA	pbt/pindel/ug/hc	F	Zuid_Holland	34	34	NA	NA	NA	NA	TGCATGTATACCCAGGAATG	AAATGGACTGACAAGAACAGG
gonl-163c	4	129328414	129328414	A	AGT	insertion	2	GT	2.3	4	NA	father	1	0	NR, CCC	polymerase slippage	NA	pbt/pindel/ug	F	Zuid_Holland	34	34	NA	0	NA	NA	TCATGGTCTTGAGGGGTCCT	AAAAGCAAGCAGGGGTAGCT
gonl-163c	6	67447435	67447438	TAGA	T	deletion	-3	AGA	2.1	7	3	NA	NA	NA	NR, CCC	polymerase slippage	NA	pbt/ug/hc	F	Zuid_Holland	34	34	NA	0	NA	NA	TTCTTGAACCTACCTTTGAGG	CTGGCTTAATAATGCTTCAGG
gonl-163c	10	131118821	131118823	CCT	C	deletion	-2	NA	NA	NA	0	NA	NA	NA	NR, non-CCC	NHEJ/hairpin loop	NA	pbt/ug	F	Zuid_Holland	34	34	NA	6	NA	NA	TTCCCAGGATGGTTTCTGGC	GAAGTGGCAAATGGCTCAGC
gonl-166c	10	58779446	58779446	A	AC	insertion	1	C	7.8	7	NA	NA	NA	NA	HR	polymerase slippage	NA	pbt/ug	M	Noord_Holland	25	22	NA	0	NA	NA	TACACAGGAAAACGAGGGGC	GAGGGAAGCATGCACAGAGT
gonl-166c	12	125305804	125305804	A	ACGCACACACACG	insertion	12	CGCACACACACG	1.2	23	NA	NA	NA	NA	TR	polymerase slippage	INTRON	hc	M	Noord_Holland	25	22	NA	NA	NA	NA	CCTATAGTCCCAGCCGCTTG	CCCTGATCACCCAGTTGGAC
gonl-16c	1	104392950	104392950	A	AT	insertion	1	T	7.8	7	NA	mother	0	1	HR	polymerase slippage	NA	pbt/ug/hc	M	Limburg	37	27	NA	0	NA	NA	GCTCTATCAGGAGAGGGAGCT	TGCACTGCTGAGCAATGACA
gonl-16c	13	49715582	49715586	ACTAT	A	deletion	-4	NA	NA	NA	3	NA	NA	NA	NR, non-CCC	NHEJ	INTRON	pbt/pindel/ug/hc	M	Limburg	37	27	NA	0	NA	NA	GAGGACAGGGGTGGAAAGTG	TGATCCCACTCTGAATCCACT
gonl-177c	1	9084398	9084398	G	GT	insertion	1	T	1.2	1	NA	NA	NA	NA	NR, CCC	polymerase slippage	INTRON	pbt/pindel/ug/hc	F	Utrecht	28	29	NA	0	NA	NA	ATGTGATTAAGTGATGGTACATTGC	AACTGACTACAGGCTTGACCTTG
gonl-178c	3	30853153	30853153	A	AT	insertion	1	T	6.7	6	NA	NA	NA	NA	HR	polymerase slippage	INTRON	pbt/ug/hc	F	Groningen	30	27	NA	0	NA	NA	CTAGGCAACAATCCACACAC	AACACTGCCCTTACTTCACAC
gonl-178c	5	99098489	99098489	C	CCTT	insertion	3	CTT	1.2	5	NA	NA	NA	NA	NR, CCC	polymerase slippage	NA	pbt/hc	F	Groningen	30	27	NA	0	NA	NA	TCTCCCTGTCACTTTCTGGT	GGGTCGAAGGACACCTCATG
gonl-178c	18	36390387	36390391	CAGAG	C	deletion	-4	AG	4.2	9	4	NA	NA	NA	TR	polymerase slippage	NA	pbt/pindel/ug/hc	F	Groningen	30	27	NA	0	NA	NA	TGAGGGAATACAATTCAACC	TCTCCTTAAGGGATCCAAAG
gonl-179c	2	56269847	56269847	A	AG	insertion	1	NA	NA	NA	NA	NA	NA	NA	NR, non-CCC	NHEJ	NA	pbt/pindel/ug/hc	F	Zeeland	27	29	NA	0	NA	NA	TGATCAGAAGGGATGACAAC	TTCTGCCAGATCACTCTATG
gonl-179c	X	5924662	5924662	CT	CAC	complex	1	NA	NA	NA	NA	NA	NA	NA	Complex	SD-MMEJ/TMEJ	INTRON	pindel	F	Zeeland	27	29	NA	9	NA	NA	GATCCAAACGCCAGATTAAC	TCTCAGCATCTTTGCCAAC
gonl-180c	5	7131650	7131651	TC	T	deletion	-1	C	3.2	3	1	NA	NA	NA	NR, CCC	polymerase slippage	NA	pbt/pindel/hc	F	Noord_Brabant	29	26	NA	0	NA	NA	TAACACCAGTGCCTATCCAACAG	TTCCTGTGGGACAAAAAGACCAT
gonl-180c	6	160936837	160936839	CAT	C	deletion	-2	NA	NA	NA	0	NA	NA	NA	NR, non-CCC	NHEJ	NA	pbt/ug/hc	F	Noord_Brabant	29	26	NA	0	NA	NA	GGCAGAGACGCAACATAAAG	CATCCTTGTCTTGTGCTGGT
gonl-180c	10	1417933	1417935	CAG	C	deletion	-2	NA	NA	NA	1	mother	0	8	NR, non-CCC	NHEJ	INTRON	pbt/pindel/ug	F	Noord_Brabant	29	26	NA	0	NA	NA	CAAGGTCATGTGTGCTCCTACC	CATGTGTGTCATGTGCATGTGTG
gonl-180c	14	58160893	58160893	ACCTCT	AGCTCTACCTCC	complex	6	NA	NA	NA	NA	NA	NA	NA	Complex	SD-MMEJ/TMEJ	NA	NA	F	Noord_Brabant	29	26	NA	0	NA	NA	GTAACCCCTTCCCATGTCAAGAA	TGTTGAAAACAACGAAGCAAAGC
gonl-180c	17	46228830	46228833	AAAG	A	deletion	-3	AAG	2.1	7	3	NA	NA	NA	NR, CCC	polymerase slippage	INTRON	pbt/pindel/ug/hc	F	Noord_Brabant	29	26	NA	0	NA	NA	TTACAGATGGAGCAGGATTGTCG	AACCCAGCTAGAAAGATAGGCAT
gonl-185c	1	194885725	194885729	AACTC	A	deletion	-4	ACTC	2.1	9	4	mother	0	1	NR, CCC	polymerase slippage	NA	pbt/pindel/hc	M	Limburg	27	20	NA	0	NA	NA	TGCTCCTAACCCACATGCTG	CAGGGATGGATGGAAGGCAA
gonl-185c	3	51131357	51131359	CAT	C	deletion	-2	NA	NA	NA	0	NA	NA	NA	NR, non-CCC	NHEJ	INTRON	pbt/ug/hc	M	Limburg	27	20	NA	0	rs140808381	NA	TGGTGAGAGGGCATCCT	AATTTCGGGCCAATATCC
gonl-185c	17	80119185	80119187	AAC	A	deletion	-2	AC	2.1	5	2	mother	0	31	TR	polymerase slippage	NA	pbt/ug/hc	M	Limburg	27	20	NA	0	NA	NA	ATGAGACGATGCTCGACACC	ACCCCAGATAGAAGCTCGGT
gonl-187c	6	61918742	61918743	AG	A	deletion	-1	G	2.1	2	1	NA	NA	NA	TR	polymerase slippage	NA	pbt/ug	M	Limburg	27	25	NA	0	NA	NA	TTGGCCTCAATGAGCTCTCA	GGCTATTTGGGAGCGCATTG
gonl-187c	18	68948214	68948215	GC	G	deletion	-1	NA	NA	NA	0	NA	NA	NA	NR, non-CCC	NHEJ	NA	pbt/ug/hc	M	Limburg	27	25	NA	0	NA	NA	GAACCAAGATATCTGTACTTACCC	TGTTACCAATAGGCATTCTCC
gonl-190c	3	54722657	54722657	A	AG	insertion	1	G	2.3	2	NA	NA	NA	NA	NR, CCC	polymerase slippage	INTRON	pbt/ug/hc	F	Overijssel	28	25	NA	0	NA	NA	GAAGGATAAAGGGAGTGAAGG	TTTCACCATGTTGCTCAGG
gonl-190c	3	123713872	123713872	C	CT	insertion	1	T	6.7	6	NA	father	1	0	HR	polymerase slippage	NA	pbt/ug/hc	F	Overijssel	28	25	NA	0	NA	NA	ACCTATCAGCAGCCTTTGAC	CTCTATGAGGAAGCCTGGAG
gonl-190c	12	1840539	1840539	T	TA	insertion	1	A	1.2	2	NA	father	8	0	NR, CCC	polymerase slippage	NA	pbt/ug/hc	F	Overijssel	28	25	NA	6	NA	NA	TCCCTCACTCTCCCAAGTAG	AAACTGATAGCGTCAGAAAGTG
gonl-190c	15	35267208	35267208	G	GC	insertion	1	C	6.7	6	NA	NA	NA	NA	HR	polymerase slippage	NA	pbt/pindel/ug/hc	F	Overijssel	28	25	NA	0	NA	NA	ATGAGCTTGGCAATTAGGAG	GTCTAAGCCAGGGTAATTGG
gonl-190c	20	41376699	41376701	TAA	T	deletion	-2	A	3.1	3	1	mother	0	6	NR, CCC	polymerase slippage	INTRON	pbt/ug/hc	F	Overijssel	28	25	NA	0	NA	NA	TGTGACAGGAAATTCTGGAG	ACCTTCCACCACCTCTATTG
gonl-190c	20	46666236	46666237	CT	C	deletion	-1	NA	NA	NA	0	NA	NA	NA	NR, non-CCC	NHEJ	NA	pbt/ug	F	Overijssel	28	25	NA	0	NA	NA	ACTCTTCCAGGAACAAGTGAC	CAGGTTTGCTTCTATGAAAGG
gonl-190c	22	42405295	42405296	CT	C	deletion	-1	T	3.2	3	1	father	7	0	NR, CCC	polymerase slippage	INTRON	pbt/ug/hc	F	Overijssel	28	25	NA	7	NA	NA	AGTAGAGACAGGGTTTCACC	CAACAAAGGTACTAAGATGACTCAG
gonl-197c	18	65510107	65510107	A	AT	insertion	1	T	4.5	4	NA	NA	NA	NA	NR, CCC	polymerase slippage	NA	pbt/pindel/ug/hc	M	Zuid_Holland	27	25	NA	0	NA	NA	TGTAGGCCTACACACAGGGT	TGCATGACTCGTGTGTTTGC
gonl-19c	3	30963687	30963687	T	TGAACTAA	insertion	7	NA	NA	NA	NA	NA	NA	NA	NR, non-CCC	NHEJ	NA	pbt/hc	F	gelderland	27	27	NA	0	NA	NA	ATTGCAGAGCCCACACTGTT	CCAACCATCCATGCTGAGGT
gonl-19c	5	4770532	4770532	A	AT	insertion	1	T	3.4	3	NA	NA	NA	NA	NR, CCC	polymerase slippage	NA	pbt/pindel/ug/hc	F	gelderland	27	27	NA	0	NA	NA	TGATCAATCCTGTTGGCATCTCC	ATGGGAAAAACCTGCTCCCATAA
gonl-19c	8	117839171	117839172	GT	G	deletion	-1	T	3.2	3	1	NA	NA	NA	NR, CCC	polymerase slippage	NA	pbt/pindel/ug/hc	F	gelderland	27	27	NA	0	NA	NA	CAGACTCCAGCCAGGTAAGGT	GCACACACCACCACATCCA
gonl-19c	19	13517235	13517235	C	CT	insertion	1	T	2.3	2	NA	NA	NA	NA	NR, CCC	polymerase slippage	INTRON	pbt	F	gelderland	27	27	NA	0	NA	NA	AGGTGGCAGAGTCAGAATGC	ACTGAATGCACCAGCCTCTC
gonl-19d	7	77032936	77032940	GAAAC	G	deletion	-4	NA	NA	NA	2	NA	NA	NA	NR, non-CCC	NHEJ	INTRON	pindel/ug/hc	F	gelderland	27	27	NA	0	NA	NA	CAAAGCCTGTCACATCAACCAAC	GGAGGTCCAATGTCCTTCTTGAG
gonl-19d	15	40623334	40623349	TGAGGTAGACAGAAGA	T	deletion	-15	NA	NA	NA	4	father	2	0	NR, non-CCC	NHEJ/MMEJ/Replication slippage	NA	pindel/hc	F	gelderland	27	27	NA	0	NA	NA	GGGGTTTGTTTCTGGGGAAAATA	CCTGCTTTACCAAGGAGTGTTCT
gonl-1c	1	75174002	75174002	G	GT	insertion	1	T	7.8	7	NA	mother	0	2	HR	polymerase slippage	INTRON	pbt/ug/hc	M	Utrecht	30	30	NA	0	NA	NA	TGAGTCAGTCTGGACCAAAG	TCCACTGACCACCATAACTTAG
gonl-1c	1	113039212	113039214	TTC	T	deletion	-2	NA	NA	NA	1	NA	NA	NA	NR, non-CCC	NHEJ	INTRON	pbt/hc	M	Utrecht	30	30	NA	0	NA	NA	TACTCATTCCATCCCAACAG	CAACATGGAGAAACCCTGTC
gonl-1c	6	6606152	6606152	C	CA	insertion	1	NA	NA	NA	NA	mother	0	41	NR, non-CCC	NHEJ	INTRON	pbt/hc	M	Utrecht	30	30	6	0	NA	NA	AAGATCCGCTTTCATGCCCA	ACCACTCGGCCTTCTCTGTA
gonl-1c	6	72248073	72248078	CATTAA	C	deletion	-5	NA	NA	NA	2	mother	0	5	NR, non-CCC	NHEJ/hairpin loop	NA	pbt/ug/hc	M	Utrecht	30	30	NA	6	NA	NA	TCACTGGATTTGTACACATTTTATC	AGTATAACACTGGGCGAAGC
gonl-1c	10	606527	606532	ATAACT	A	deletion	-5	NA	NA	NA	3	NA	NA	NA	NR, non-CCC	NHEJ	INTRON	pbt/pindel/ug/hc	M	Utrecht	30	30	NA	0	NA	NA	AGAGACAAGCTAAACACAACC	GGGTGATAAGGCAAGTCC
gonl-1c	16	15251451	15251451	C	CTCT	insertion	3	NA	NA	NA	NA	NA	NA	NA	NR, non-CCC	NHEJ	NA	pbt	M	Utrecht	30	30	NA	0	rs576080475	0.0018	CTCTATGCCCATCTCTGGTC	TTGTGCTATCAGCAGAAGTTG
gonl-204c	2	57940063	57940079	AATTCAGATCTTTTAAC	A	deletion	-16	NA	NA	NA	6	NA	NA	NA	NR, non-CCC	NHEJ/MMEJ/Replication slippage	NA	pbt/pindel/hc	M	Zuid_Holland	36	36	NA	0	NA	NA	AAGGGCTTTGCAGGGCATAT	TTCTTTCCACCACACCTCGG
gonl-204c	8	68872359	68872359	T	TTCCC	insertion	4	TCCC	1.2	6	NA	NA	NA	NA	NR, CCC	polymerase slippage	INTRON	pbt/hc	M	Zuid_Holland	36	36	NA	0	NA	NA	GGCAAACAACACAGCCTCTG	GCCAAGCTCAGTCTGTGGAT
gonl-204c	14	103197683	103197697	ACAGCTACAGGCAGG	A	deletion	-14	NA	NA	NA	0	NA	NA	NA	NR, non-CCC	NHEJ	NA	pbt/ug/hc	M	Zuid_Holland	36	36	NA	0	NA	NA	ATACCTGGAGGCAGGATGGT	ACCACAAGCCACCTTCACAA
gonl-205c	4	44998300	44998300	G	GTAGC	insertion	4	TAGC	1.2	7	NA	NA	NA	NA	NR, CCC	polymerase slippage	NA	pbt/hc	M	gelderland	25	23	NA	0	NA	NA	CTGCAGAGGACCCCTAGAGT	CGTGTGCAGTGTGTTCACAG
gonl-205c	5	12710274	12710275	CA	C	deletion	-1	A	2.1	2	1	NA	NA	NA	NR, CCC	polymerase slippage	NA	pbt/pindel/ug/hc	M	gelderland	25	23	NA	0	NA	NA	AAAAGCCTAGGAAAGTGACC	TTTTCCAATCTTTTCAATCAG
gonl-205c	5	139907132	139907133	AT	A	deletion	-1	T	2.1	2	1	NA	NA	NA	NR, CCC	polymerase slippage	INTRON	pbt/pindel/ug/hc	M	gelderland	25	23	NA	0	NA	NA	ATGTCAGCTCATCATTGACC	CATTTCTTAAATGCTAAAGAGG
gonl-205c	7	142829387	142829387	G	GA	insertion	1	A	1.2	2	NA	NA	NA	NA	NR, CCC	polymerase slippage	INTRON	pbt/pindel/ug/hc	M	gelderland	25	23	NA	6	NA	NA	CTGCTCCTGGTTCTCTGC	TTGGAGCTTTATTTCCACTG
gonl-205c	12	92284185	92284186	GC	G	deletion	-1	C	4.3	4	1	NA	NA	NA	NR, CCC	polymerase slippage	NA	pbt/pindel/hc	M	gelderland	25	23	NA	0	NA	NA	TCCATGGTGTTACATTCCAG	CCAATGTCTAGGCTGAAACC
gonl-206c	6	143883429	143883429	C	CA	insertion	1	A	1.2	1	NA	NA	NA	NA	NR, CCC	polymerase slippage	NA	pbt/pindel/hc	M	Zeeland	20	19	NA	0	NA	NA	TTGTTCTTCCCTTTGTGACC	ATTCCTCATGGCTTGGTG
gonl-206c	7	141953787	141953788	AT	A	deletion	-1	T	2.1	2	1	NA	NA	NA	NR, CCC	polymerase slippage	INTRON	pbt/pindel/ug/hc	M	Zeeland	20	19	NA	0	NA	NA	GGAATACTTCTGTAGGAAATGC	TGGTGAAAGGGAGTTGATTAC
gonl-209c	3	163237415	163237415	C	CT	insertion	1	T	5.6	5	NA	father	7	0	NR, CCC	polymerase slippage	NA	ug/hc	F	Overijssel	29	29	NA	0	NA	NA	CAAGGCCAAGTGCTGAAACC	TGGCCTATTCTAGGGGCTGT
gonl-209c	13	103526010	103526028	TAACGAAAGGAAGTCTTCA	T	deletion	-18	NA	NA	NA	2	NA	NA	NA	NR, non-CCC	NHEJ	INTRON	pbt/pindel/hc	F	Overijssel	29	29	NA	0	NA	NA	GCCCAGCAGGTAATCATGGT	GGCTCCTTCCCACAAAAACC
gonl-209c	17	41153647	41153650	AAAT	A	deletion	-3	AAT	3.2	11	3	NA	NA	NA	TR	polymerase slippage	INTRON	pbt/ug	F	Overijssel	29	29	NA	0	NA	NA	TGGTGGCTGGCACATGTAAT	TACAAGCCTGAGCCACTGTG
gonl-209c	18	64024505	64024509	TTCTC	T	deletion	-4	TC	3.1	7	3	NA	NA	NA	NR, CCC	polymerase slippage	NA	pbt/pindel/ug/hc	F	Overijssel	29	29	NA	0	NA	NA	ACCGTGTGAAACCAAGCTCA	GCGATGGCAGGATGAGAAGA
gonl-20c	1	181893457	181893458	TC	T	deletion	-1	C	2.1	2	1	NA	NA	NA	NR, CCC	polymerase slippage	NA	pbt/pindel/ug/hc	F	Utrecht	39	33	NA	6	NA	NA	AACCGAAATACCATTTGACC	GCACTGGTGTGTGATGTTC
gonl-20c	4	23435189	23435189	A	AGTAAT	insertion	5	GTAAT	2.3	10	NA	mother	0	5	NR, CCC	polymerase slippage	NA	pbt/ug/hc	F	Utrecht	39	33	NA	0	NA	NA	TGACACCACCTACCTAAATCC	GAAGTCCGAGATCAGGACAC
gonl-20c	4	56410799	56410799	T	TC	insertion	1	C	1.2	1	NA	father	15	0	NR, CCC	polymerase slippage	NA	pbt/ug/hc	F	Utrecht	39	33	NA	0	NA	NA	CTGAAAGCAGCATAATCCAG	TACATCTTAAGGGCGAGGTG
gonl-20c	7	125170136	125170136	A	AT	insertion	1	T	7.8	7	NA	NA	NA	NA	HR	polymerase slippage	NA	pbt/ug/hc	F	Utrecht	39	33	NA	0	NA	NA	TAAGCACCACCAGGTCATAG	ATGGATCATGCCTTCAATTC
gonl-20c	12	50124193	50124198	TTTTTA	T	deletion	-5	TTTTA	2.1	14	5	NA	NA	NA	TR	polymerase slippage	NA	pbt/pindel/ug	F	Utrecht	39	33	NA	6	NA	NA	CTTTGCAACCTGTTTGTAGTG	AGGGTTAGAAGAAGTGATGCTC
gonl-20c	X	95096238	95096239	CT	C	deletion	-1	T	3.2	3	1	NA	NA	NA	NR, CCC	polymerase slippage	NA	pindel	F	Utrecht	39	33	NA	0	NA	NA	TTACAGCCATCCTTTATTGG	CTGGCCACACATACTGACAC
gonl-213c	3	51797592	51797592	C	CA	insertion	1	A	7.8	7	NA	NA	NA	NA	HR	polymerase slippage	NA	pbt/ug/hc	M	Zeeland	28	25	NA	0	NA	NA	CCTCTGTTTTTGTGCTCCGC	GCACACACCTGGAGTCCTAG
gonl-213c	5	15193592	15193599	TGAGGACA	T	deletion	-7	NA	NA	NA	0	NA	NA	NA	NR, non-CCC	NHEJ	NA	pbt/pindel/ug/hc	M	Zeeland	28	25	NA	0	NA	NA	AGCCCACACAGTTCTAAGGC	CCGCACATGGTCTTTCCTCT
gonl-213c	12	104437504	104437505	CA	C	deletion	-1	A	3.2	3	1	NA	NA	NA	NR, CCC	polymerase slippage	NA	pbt/pindel/ug	M	Zeeland	28	25	NA	0	NA	NA	CCCCAAATCAGTTCGGGTGA	AGCTGAAGGGAGACAAAGGC
gonl-214c	4	141760804	141760804	A	ATC	insertion	2	NA	NA	NA	NA	NA	NA	NA	NR, non-CCC	NHEJ	NA	pbt/ug/hc	F	Utrecht	28	27	NA	0	NA	NA	GAACCTGTTAATGGTTTCTGG	GAAGGTGGTGCTACACACAG
gonl-214c	9	25057631	25057634	TAAA	T	deletion	-3	A	7.4	7	3	NA	NA	NA	HR	polymerase slippage	NA	pbt/ug/hc	F	Utrecht	28	27	NA	0	NA	NA	GGCCCATAGAAAGGAGTTG	AGCCTCTTGTCAGTCTGTCTC
gonl-214c	14	77496579	77496585	TTTTCCA	T	deletion	-6	NA	NA	NA	1	NA	NA	NA	NR, non-CCC	NHEJ	NA	pbt/pindel/ug/hc	F	Utrecht	28	27	6	0	NA	NA	CTTATGGCACGATGGATATG	ACTAGGGAGGCTGAGGTG
gonl-214c	15	56663694	56663695	CT	C	deletion	-1	T	7.6	7	1	NA	NA	NA	HR	polymerase slippage	INTRON	pbt/ug/hc	F	Utrecht	28	27	NA	6	NA	NA	TCCTTCTATGCCCATTATGC	AAGAAAGCTGACGTGGAATC
gonl-219c	3	43295992	43295994	CTT	C	deletion	-2	NA	NA	NA	0	NA	NA	NA	NR, non-CCC	NHEJ	NA	pbt/hc	F	Zeeland	40	36	NA	0	NA	NA	AAATGCCTTCCTCCCACTGG	TCTCAGCAGAGAGGGGCTAG
gonl-219c	4	188738569	188738573	AATAG	A	deletion	-4	NA	NA	NA	2	NA	NA	NA	NR, non-CCC	NHEJ	NA	pbt/ug/hc	F	Zeeland	40	36	NA	0	NA	NA	TCAGGCATGCAGTTAGGGAA	CCAGAGGCTACCAAGGGTTG
gonl-219c	8	62239339	62239340	CA	C	deletion	-1	A	4.3	4	1	NA	NA	NA	NR, CCC	polymerase slippage	INTRON	pbt/ug/hc	F	Zeeland	40	36	NA	0	NA	NA	TACCTCTGGGTAGGAGGTGC	AGGTGTTTATGCTCAACACCA
gonl-219c	10	132430514	132430516	ACT	A	deletion	-2	CT	2.1	4	2	NA	NA	NA	NR, CCC	polymerase slippage	NA	pbt/pindel/ug/hc	F	Zeeland	40	36	NA	6	NA	NA	AGGAGGTCAGATTTCATATACCTTTGT	GAGTGTGCGGGTGTGTGAA
gonl-219d	1	4679660	4679661	GT	G	deletion	-1	T	3.2	3	1	NA	NA	NA	NR, CCC	polymerase slippage	NA	ug/hc	M	Zeeland	40	36	NA	0	NA	NA	TCTCTGCAGGTTCAGGGGTA	ACGGTTAACTGCAGCCTCAA
gonl-219d	7	116439913	116439913	A	AATTG	insertion	4	ATTG	1.2	7	NA	mother	0	1	NR, CCC	polymerase slippage	NA	pindel/ug/hc	M	Zeeland	40	36	NA	6	NA	NA	GAATGCTGACATCTGGCATTGTT	TCATCAAATTCCTTGGGGTGAGA
gonl-219d	12	129531501	129531502	TC	T	deletion	-1	C	2.1	2	1	NA	NA	NA	NR, CCC	polymerase slippage	NA	ug/hc	M	Zeeland	40	36	NA	0	NA	NA	ACTGGCCGTAAACATCTGGG	GGGCGATCTTGCTTCTCAGT
gonl-221c	3	167190846	167190849	TAAG	T	deletion	-3	NA	NA	NA	2	NA	NA	NA	NR, non-CCC	NHEJ/hairpin loop	NA	pbt/ug	M	Friesland	30	30	NA	6	NA	NA	GGTAGAATGTTGACTCCAAGG	TTGTTGCACTCTCATTTATAAGC
gonl-221c	17	72673006	72673007	TC	T	deletion	-1	C	2.1	2	1	NA	NA	NA	NR, CCC	polymerase slippage	INTRON	pbt/ug/hc	M	Friesland	30	30	NA	0	NA	NA	AAACGTGAGCTGCTCATCCA	CACCACCACGGCTGACTAAT
gonl-224c	2	135535660	135535661	GA	G	deletion	-1	A	4.3	4	1	NA	NA	NA	NR, CCC	polymerase slippage	NA	pbt/ug	F	Limburg	36	31	NA	0	NA	NA	AGAGAGAAGGCAGACACCAC	TTCCCTACAGCATCATTGC
gonl-224c	20	30609626	30609630	TTGTC	T	deletion	-4	TGTC	2.1	8	4	NA	NA	NA	NR, CCC	polymerase slippage	INTRON	pbt/pindel/ug/hc	F	Limburg	36	31	NA	0	NA	NA	ACCGGAGTGTGACTCTATCTC	GCCTTAAGCAAGACACACAG
gonl-22c	18	32458445	32458445	C	CT	insertion	1	T	7.8	7	NA	NA	NA	NA	HR	polymerase slippage	INTRON	hc	M	Overijssel	33	28	NA	0	rs371362654	0.001	ACAGGGTGTCTCTGTGTTGC	TGGTAGGTCGGCCTTAAGGA
gonl-236c	1	42715672	42715677	TAGTAC	T	deletion	-5	NA	NA	NA	4	NA	NA	NA	NR, non-CCC	NHEJ/MMEJ/Replication slippage	INTRON	pbt/ug/hc	M	Zuid_Holland	35	29	NA	0	NA	NA	CTGGCCCCAACCTACTGATC	TGCCTTCTACATTGCTGCCT
gonl-236c	3	108389073	108389074	TCATCACC	TGAATAA	complex	-1	NA	NA	NA	NA	NA	NA	NA	Complex	NA	INTRON	NA	M	Zuid_Holland	35	29	7	0	NA	NA	TCAACACTTTCTGGCTGGCA	TGGTGCAGCTACTTGGAAAAC
gonl-236c	4	78124416	78124418	CAT	C	deletion	-2	AT	2.1	4	2	NA	NA	NA	NR, CCC	polymerase slippage	NA	pbt/ug/hc	M	Zuid_Holland	35	29	NA	0	NA	NA	CCGTCTTCCTCTCCAGCTTG	AACAGGGGGCGCTTAGTAAC
gonl-239c	4	60259547	60259548	GT	G	deletion	-1	T	2.1	2	1	father	4	0	NR, CCC	polymerase slippage	NA	pbt/pindel/ug/hc	F	Overijssel	29	28	NA	0	NA	NA	TGGGGATCTTCGGATGGAGT	GGGACAGAGCTCCTAGGGAA
gonl-239d	3	31723929	31723929	TTCC	TGGAGCCCA	complex	5	NA	NA	NA	NA	NA	NA	NA	Complex	SD-MMEJ/TMEJ	INTRON	NA	F	Overijssel	29	28	9	0	NA	NA	TCCAAGCCACCATCATCACC	TTCAGATGAGCTGGCCAGTG
gonl-239d	4	97526412	97526416	CTGAT	C	deletion	-4	NA	NA	NA	0	father	2	0	NR, non-CCC	NHEJ	NA	pindel/ug/hc	F	Overijssel	29	28	NA	0	NA	NA	GCTGGGATTAAAGAAATGTTTAGGGT	TCACAGGACTATCTTCATCTGCAC
gonl-239d	12	24442313	24442315	CTT	C	deletion	-2	NA	NA	NA	0	mother	0	4	NR, non-CCC	NHEJ	NA	pindel/ug/hc	F	Overijssel	29	28	NA	0	NA	NA	TCTGATGAAAGTTACAAACCTAATCCA	TTAAGACCGTCCTGAAGAAAGGC
gonl-239d	20	45663058	45663059	AC	A	deletion	-1	NA	NA	NA	0	NA	NA	NA	NR, non-CCC	NHEJ	INTRON	pindel/ug/hc	F	Overijssel	29	28	NA	0	NA	NA	TGGCAGACAACAGTATTTGGC	AGGATAGCCTGGCCTCTGAA
gonl-23c	1	85893351	85893355	AAAAC	A	deletion	-4	AAAC	3.2	13	4	NA	NA	NA	TR	polymerase slippage	INTRON	pbt/hc	F	Limburg	28	27	NA	0	NA	NA	AACTTGGATTCAAGCAAGAC	TCCCTCACCTGTGATATTTG
gonl-248c	6	66785515	66785519	GTATT	G	deletion	-4	TATT	2.1	8	4	NA	NA	NA	NR, CCC	polymerase slippage	NA	pbt/ug/hc	M	gelderland	34	31	NA	0	NA	NA	ACTCCTGTAGCGTGTGTGTG	CTCTCAAAGGCTGGGTTGGT
gonl-249c	2	234917767	234917768	CG	C	deletion	-1	G	4.3	4	1	NA	NA	NA	NR, CCC	polymerase slippage	INTRON	pbt/pindel/ug/hc	F	Noord_Holland	38	38	NA	0	NA	NA	GCAGTAGTTGGCAGCTGTG	AAACCCTAAGATGGCTTTCC
gonl-249c	6	55193315	55193319	TTTTG	T	deletion	-4	NA	NA	NA	3	NA	NA	NA	NR, non-CCC	NHEJ	INTRON	pbt/pindel/ug/hc	F	Noord_Holland	38	38	NA	0	NA	NA	TCTTCTTTAGCATTTGGTAGAATC	TGAGGTCATAATGAGTCTGTAATG
gonl-249c	9	133743604	133743605	CA	C	deletion	-1	A	3.2	3	1	NA	NA	NA	NR, CCC	polymerase slippage	INTRON	pbt	F	Noord_Holland	38	38	NA	0	NA	NA	CTCACCGCAAGCTCCAC	AGTTTCCACATCTGTTTCTGG
gonl-249c	10	123277875	123277875	T	TCA	insertion	2	NA	NA	NA	NA	NA	NA	NA	NR, non-CCC	NHEJ	INTRON	pbt/pindel/ug/hc	F	Noord_Holland	38	38	NA	0	NA	NA	TTGCCTTTAGTAGCGTCCAG	ACTTGGTGCTTTGGGAGAC
gonl-249c	X	87183590	87183592	CCT	C	deletion	-2	NA	NA	NA	0	NA	NA	NA	NR, non-CCC	NHEJ	NA	pindel	F	Noord_Holland	38	38	NA	0	NA	NA	ACACCTCCCTAATTCATTGC	GCCTCCTTGTTTTGTTTCAG
gonl-24c	1	90908162	90908162	C	CCA	insertion	2	CA	6.7	12	NA	NA	NA	NA	TR	polymerase slippage	NA	pbt/pindel/ug/hc	F	Friesland	26	25	NA	0	rs557175520	0.013	AGGGAGGAGCGATACATTAG	CAGGGAAATGTCACTCCTTC
gonl-24c	3	127628495	127628496	CT	C	deletion	-1	T	2.1	2	1	father	4	0	NR, CCC	polymerase slippage	NA	pbt/ug/hc	F	Friesland	26	25	NA	0	NA	NA	TGTTCTCTTAAGGGCCTGAG	TGCTGACTTCCAAGAACAGG
gonl-27c	1	87386732	87386735	ATGT	A	deletion	-3	TGT	2.1	6	3	NA	NA	NA	NR, CCC	polymerase slippage	INTRON	pbt/pindel/ug/hc	M	Overijssel	33	30	NA	0	rs375676273	0.0006	ACCTGATTCTGTTGCCTCAC	ACATGACAGCCTAAATGTGC
gonl-27c	1	168825118	168825119	AG	A	deletion	-1	G	3.2	3	1	NA	NA	NA	NR, CCC	polymerase slippage	NA	pbt/ug/hc	M	Overijssel	33	30	NA	0	NA	NA	CTGCTCTGCAGAAGACAATG	GCGTGAGTGTTGGATCATAG
gonl-27c	4	22023746	22023747	TG	T	deletion	-1	G	4.3	4	1	NA	NA	NA	NR, CCC	polymerase slippage	NA	pbt/pindel/ug/hc	M	Overijssel	33	30	NA	0	NA	NA	CCAGCAAAGTAGGCACTAAAC	CAATTCTGGAGGATGGAAAG
gonl-27c	8	73957431	73957431	G	GT	insertion	1	T	7.8	7	NA	NA	NA	NA	HR	polymerase slippage	INTRON	pbt/pindel/ug/hc	M	Overijssel	33	30	NA	0	NA	NA	TCTTCAGGTCCCTGCTCTC	CTGATACTTGGCATTTGCTAC
gonl-27c	12	85912063	85912064	AT	A	deletion	-1	T	2.1	2	1	NA	NA	NA	NR, CCC	polymerase slippage	NA	pbt/ug/hc	M	Overijssel	33	30	NA	0	NA	NA	TAATACTTCTACTTATCCCTGACC	TTACACACCAGAAGCACACC
gonl-27c	18	60499974	60499977	CTGT	C	deletion	-3	TGT	3.2	10	3	NA	NA	NA	TR	polymerase slippage	INTRON	pbt/ug/hc	M	Overijssel	33	30	NA	0	NA	NA	AGGCAGGAAAGCACATGGAA	GAGAGTGCAGTGACCCAAGA
gonl-34c	6	152537618	152537618	C	CT	insertion	1	T	5.6	5	NA	NA	NA	NA	NR, CCC	polymerase slippage	INTRON	pbt/ug	M	gelderland	31	26	NA	0	NA	NA	TGGCACTTACAGGGAATAAG	AGGTTTCCCACTGCTCTTAG
gonl-34c	8	100419450	100419452	TAC	T	deletion	-2	NA	NA	NA	1	NA	NA	NA	NR, non-CCC	NHEJ	INTRON	pbt/pindel/ug/hc	M	gelderland	31	26	NA	0	NA	NA	CCAACTTATACAGGGCTTTG	GAAGCACTGATGACCTCTCAC
gonl-39c	5	32022262	32022265	GTCT	G	deletion	-3	TCT	3.2	10	3	NA	NA	NA	TR	polymerase slippage	INTRON	pbt/pindel/hc	F	Overijssel	28	25	NA	0	NA	NA	CTTTAGCTCCTGGGGCAGAC	GCACATGGCTCCTTGAGGAT
gonl-39c	10	124620133	124620135	ATT	A	deletion	-2	T	6.4	6	2	father	2	0	HR	polymerase slippage	NA	pbt/ug/hc	F	Overijssel	28	25	NA	0	NA	NA	CATACATTGAAGGACATGTGG	CATATGGATGGCAAATAAGC
gonl-41c	2	48845775	48845782	GACATGCT	G	deletion	-7	NA	NA	NA	2	NA	NA	NA	NR, non-CCC	NHEJ	INTRON	pbt/pindel/ug/hc	M	Zeeland	28	27	NA	0	NA	NA	GTGGCACTTAGGAGACCATC	TGACCACAGACTTTGTATTGC
gonl-41d	1	22818178	22818180	GTC	G	deletion	-2	NA	NA	NA	1	NA	NA	NA	NR, non-CCC	NHEJ	INTRON	ug/hc	F	Zeeland	28	27	NA	0	NA	NA	CTTCTCAGATGCACTCATGG	AAATGGCCACTGTTATTCC
gonl-41d	1	199325670	199325677	TAGTATGGTA	AAG	complex	-7	NA	NA	NA	NA	NA	NA	NA	Complex	SD-MMEJ/TMEJ	NA	NA	F	Zeeland	28	27	NA	0	NA	NA	GTTTTGGGGAACTTGGTGGC	GTGCTCACCCCAGAGTTCAA
gonl-41d	3	42505193	42505194	TG	T	deletion	-1	NA	NA	NA	0	NA	NA	NA	NR, non-CCC	NHEJ	NA	pindel/ug/hc	F	Zeeland	28	27	NA	0	NA	NA	TCCAGCACAAAGTCCAGGTC	TCCTCTTTCCTCGGCCTTCT
gonl-41d	16	78564737	78564741	CATTG	C	deletion	-4	ATTG	2.1	9	4	mother	0	1	NR, CCC	polymerase slippage	INTRON	ug/hc	F	Zeeland	28	27	NA	0	NA	NA	CTTTGGGCCACAGTTCC	CCAAAGAACCAAACCAAATC
gonl-42c	1	112824575	112824575	G	GA	insertion	1	A	9.1	9	NA	NA	NA	NA	HR	polymerase slippage	NA	pbt/ug/hc	F	Noord_Holland	39	27	NA	0	NA	NA	AACATTCCAGTGTGGTCTTAG	AGGGATGATGTGACCTGTTC
gonl-42c	4	82734211	82734211	A	AG	insertion	1	G	7.8	7	NA	NA	NA	NA	HR	polymerase slippage	NA	pbt/ug/hc	F	Noord_Holland	39	27	NA	0	NA	NA	CAGCATTTGCTCACAACAAC	TGGCAGCTGCTATAATTGTC
gonl-42c	4	104547813	104547813	T	TA	insertion	1	A	1.2	1	NA	father	1	0	NR, CCC	polymerase slippage	INTRON	pbt/pindel/hc	F	Noord_Holland	39	27	NA	0	NA	NA	CTGGTGTAACCAGCTAAGG	GATAACGGGTGTGAGCTACC
gonl-42c	12	97530116	97530117	GC	G	deletion	-1	NA	NA	NA	0	father	12	0	NR, non-CCC	NHEJ	NA	pbt/ug/hc	F	Noord_Holland	39	27	NA	0	NA	NA	GGGATTTCATTACACTTCTGC	TGGATCTTGTACTGCCACAC
gonl-42c	19	56968644	56968644	G	GT	insertion	1	T	1.2	1	NA	NA	NA	NA	NR, CCC	polymerase slippage	INTRON	pindel	F	Noord_Holland	39	27	NA	0	NA	NA	GATGACGCATCCCATCTAAG	TCACCCAGCTAGGAAGGAG
gonl-42c	X	43286845	43286847	CTA	C	deletion	-2	NA	NA	NA	1	NA	NA	NA	NR, non-CCC	NHEJ	NA	pindel	F	Noord_Holland	39	27	NA	0	NA	NA	TGAAAGCAGCAAGTGAACAG	AGAGAGCTTTGTCCATCAGG
gonl-43c	18	67683501	67683501	G	GA	insertion	1	A	5.6	5	NA	NA	NA	NA	NR, CCC	polymerase slippage	INTRON	pbt/ug/hc	F	Limburg	29	20	NA	0	NA	NA	ACATCACGCAGCAACAGAGA	ACCCCTACACACCTGGTCTT
gonl-44c	1	187104398	187104399	GT	G	deletion	-1	T	8.7	8	1	NA	NA	NA	HR	polymerase slippage	NA	pbt/ug	M	Limburg	31	32	NA	6	NA	NA	GCACCTACAGTCAACTGATTTC	TGCTATTGAGTTGTTTGAGTTTC
gonl-44c	1	187245935	187245936	TG	T	deletion	-1	NA	NA	NA	0	father	8	0	NR, non-CCC	NHEJ	NA	pbt/pindel/ug/hc	M	Limburg	31	32	NA	0	NA	NA	ATGGTATTTCTTTGGTGCAG	GGGCAGGAATTGTTCAATAG
gonl-44c	2	58425466	58425471	AATAAC	A	deletion	-5	ATAAC	2.1	10	5	NA	NA	NA	TR	polymerase slippage	INTRON	pbt/pindel/ug/hc	M	Limburg	31	32	NA	6	NA	NA	TGCATGTAGAGAGGGAGAAAG	ACAGTTGTCCCAGAGTATCC
gonl-44c	6	103072685	103072686	GC	G	deletion	-1	C	2.1	2	1	father	6	0	NR, CCC	polymerase slippage	NA	pbt/pindel/ug/hc	M	Limburg	31	32	NA	0	NA	NA	TGCCTGGCTTATTTATTTAAC	CATACAAATGAGAAACAGGTATATG
gonl-44c	7	16312609	16312609	C	CT	insertion	1	T	3.4	3	NA	NA	NA	NA	NR, CCC	polymerase slippage	NA	pbt	M	Limburg	31	32	NA	0	NA	NA	GTCTTTCAGACATTAGGTATTAGCC	GGATTTCCGTGTCTCCTG
gonl-44c	7	42199409	42199410	GCAGT	GTAA	complex	-1	CAGT	1,-1	1	NA	NA	NA	NA	Complex	SD-MMEJ/TMEJ	INTRON	pindel	M	Limburg	31	32	6	0	NA	NA	TGCCAGATATATTTCCATCC	AGTGCTAGGAGCAAGTCTGG
gonl-44c	15	41982586	41982586	A	AT	insertion	1	T	3.4	3	NA	NA	NA	NA	NR, CCC	polymerase slippage	INTRON	pbt/pindel/ug/hc	M	Limburg	31	32	NA	0	NA	NA	CCAACACAACCACCTGTCTC	TGCCCAGTCAACAGTGTG
gonl-45c	20	6516253	6516256	ACCT	A	deletion	-3	NA	NA	NA	2	father	1	0	NR, non-CCC	NHEJ	NA	pbt/pindel/ug/hc	M	Noord_Holland	25	25	NA	0	NA	NA	GTCTTGGAAGGGACCTTTG	TACGTGGAAAGATACGCAAC
gonl-49c	5	22468437	22468438	AT	A	deletion	-1	NA	NA	NA	0	NA	NA	NA	NR, non-CCC	NHEJ	NA	pbt/pindel/ug/hc	F	Noord_Brabant	41	37	NA	0	NA	NA	ATGAGGACCCAATACCCCCA	TTCTCAAGAAGGGGACTGGT
gonl-49c	10	80889367	80889369	CTT	C	deletion	-2	T	3.1	3	1	NA	NA	NA	NR, CCC	polymerase slippage	NA	pbt/pindel/ug/hc	F	Noord_Brabant	41	37	NA	0	NA	NA	ACCTGTCACTTGTGGGCAAA	GATGTGGGGGTCAGGGAAAG
gonl-4c	3	31230958	31230959	GT	G	deletion	-1	NA	NA	NA	0	NA	NA	NA	NR, non-CCC	NHEJ	NA	pbt/pindel/ug/hc	M	Friesland	25	22	NA	0	NA	NA	TCTAGCCACCCAACCTAGAG	AGCCCTGGTTCTACTGAGG
gonl-4c	8	50112714	50112715	GC	G	deletion	-1	C	4.3	4	1	mother	0	3	NR, CCC	polymerase slippage	NA	pbt/ug	M	Friesland	25	22	NA	0	NA	NA	TGTGAATCCGTCTGGTCCTG	TCTTGGCAATGTGGGCTGT
gonl-4c	10	53257769	53257779	CAGCATAGGTA	C	deletion	-10	NA	NA	NA	3	NA	NA	NA	NR, non-CCC	NHEJ	INTRON	pbt/ug/hc	M	Friesland	25	22	6	0	NA	NA	GGCTTTCTGTGAGCTCTTTC	CAAGGACATAGTGGAAGTTGC
gonl-4c	10	119766499	119766503	TATAA	T	deletion	-4	NA	NA	NA	1	NA	NA	NA	NR, non-CCC	NHEJ	NA	pbt/pindel/ug/hc	M	Friesland	25	22	NA	0	NA	NA	AAATTCACAAACATTAGAACAGC	TTCCCGTTTGAGGTCTTG
gonl-51c	1	60835431	60835432	CA	C	deletion	-1	NA	NA	NA	0	NA	NA	NA	NR, non-CCC	NHEJ	NA	pbt/pindel/ug/hc	F	Limburg	26	28	NA	0	NA	NA	ACTCCAAGTTCTTCAGTTTTTCAGT	AGGAGAGAATGAGGCACCCATAA
gonl-51c	3	62250482	62250485	TAGG	T	deletion	-3	NA	NA	NA	2	NA	NA	NA	NR, non-CCC	NHEJ	INTRON	pbt/pindel/ug/hc	F	Limburg	26	28	NA	0	NA	NA	TCCGCTTCTCAGCTAGTATGAAT	GGTGGGAACGTAAAATGAATAGCC
gonl-51c	8	24510626	24510630	ACACT	A	deletion	-4	NA	NA	NA	3	NA	NA	NA	NR, non-CCC	NHEJ	NA	pbt/ug/hc	F	Limburg	26	28	NA	0	NA	NA	ATCCCTGAAGGCTGGCTAGA	GTCGTCTTTGGCACAGGGTA
gonl-51d	1	176055113	176055116	CAGA	C	deletion	-3	NA	NA	NA	2	NA	NA	NA	NR, non-CCC	NHEJ	INTRON	pindel/ug/hc	F	Limburg	26	28	NA	0	NA	NA	TTCGTCTTGATGCTAACGTGCTA	AGTTTTTTACTATTTGTGATCATTTTACTGTG
gonl-51d	4	42806684	42806686	GAGG	GC	complex	-2	AGG	1,-1	3	NA	NA	NA	NA	Complex	SD-MMEJ/TMEJ	NA	pindel	F	Limburg	26	28	NA	0	NA	NA	ACAGATCAAATTGGGAATAACTGGT	AAAGAAAAGACTCAGACTGGCAT
gonl-51d	7	152239717	152239718	TA	T	deletion	-1	NA	NA	NA	0	father	2	0	NR, non-CCC	NHEJ	NA	pindel/ug/hc	F	Limburg	26	28	NA	0	NA	NA	AAAGTAAGCATGTTGGGCAGTAG	AATTCTGTCCTGAAATGGATGCC
gonl-51d	8	127875291	127875293	ATG	A	deletion	-2	NA	NA	NA	1	NA	NA	NA	NR, non-CCC	NHEJ	NA	pindel/ug/hc	F	Limburg	26	28	NA	0	NA	NA	GGGGTCAATGAAAAGTGAAGAGC	TCAAAGTTTAAGCAGAGGGTCGT
gonl-51d	10	93253091	93253092	TA	T	deletion	-1	NA	NA	NA	0	NA	NA	NA	NR, non-CCC	NHEJ	INTRON	ug/hc	F	Limburg	26	28	NA	0	NA	NA	ACCCTGTTTCTACCCTTGGT	AGCACCTCCTAGTGGAAAGT
gonl-52c	8	78110034	78110035	AG	A	deletion	-1	G	3.2	3	1	NA	NA	NA	NR, CCC	polymerase slippage	NA	pbt/pindel/ug/hc	F	Noord_Brabant	24	26	NA	0	NA	NA	CACATGCCTCCGTTCCATCA	ACAGGCTCAAAGACTCCAGC
gonl-59c	2	84797164	84797166	CAT	C	deletion	-2	NA	NA	NA	0	NA	NA	NA	NR, non-CCC	NHEJ	INTRON	pbt/pindel/ug/hc	F	Noord_Holland	35	30	NA	0	NA	NA	GAATGAACCCTATGTTGTTGC	GGCTTCACCTCTCACCAG
gonl-59c	5	161477594	161477598	TTCCC	T	deletion	-4	NA	NA	NA	2	father	1	0	NR, non-CCC	NHEJ	NA	pbt/ug	F	Noord_Holland	35	30	NA	0	NA	NA	CAGTCTGTCTACCATCCATCC	GGAGAATTCAAACTCCAATG
gonl-60c	3	81186835	81186837	CAT	C	deletion	-2	NA	NA	NA	1	NA	NA	NA	NR, non-CCC	NHEJ	NA	pbt/hc	F	Noord_Brabant	39	33	NA	0	NA	NA	GCATTGTGGTTACAGAGTGGC	TTAGACGCCAGGAAGCTTGG
gonl-60c	11	127892918	127892922	TGATA	T	deletion	-4	GATA	2.1	9	4	NA	NA	NA	TR	polymerase slippage	NA	pbt/ug/hc	F	Noord_Brabant	39	33	NA	0	rs577074077	NA	TCCTTCAGAATTCAGCCTTG	CCAATGGAATGTGCATAGC
gonl-60c	21	15632281	15632282	CCT	CA	complex	-1	NA	NA	NA	NA	NA	NA	NA	Complex	NA	NA	NA	F	Noord_Brabant	39	33	NA	0	NA	NA	CTGGGAAATTAATTCTGACTATC	AGCACACCTTTCAAATAGCC
gonl-63c	1	104414203	104414204	GA	G	deletion	-1	A	5.4	5	1	NA	NA	NA	TR	polymerase slippage	NA	pbt/pindel/ug/hc	F	Drenthe	24	22	NA	0	NA	NA	TTGTGAGCCCATTGACACCT	TGAGCTGAATCCACCCATCA
gonl-63c	4	111388738	111388740	TGA	T	deletion	-2	GA	2.1	4	2	NA	NA	NA	NR, CCC	polymerase slippage	NA	pbt/ug/hc	F	Drenthe	24	22	NA	8	NA	NA	CAGGAGCACGGTGATGACAA	CCCCTGATATCGCCTTGTCC
gonl-63c	6	14022950	14022952	GGC	G	deletion	-2	NA	NA	NA	0	NA	NA	NA	NR, non-CCC	NHEJ	NA	pbt/ug/hc	F	Drenthe	24	22	NA	0	NA	NA	GCACTGGACATTGCAACTGG	ATGGCAGCAGGAGAGAGACA
gonl-63c	21	45461596	45461596	A	AT	insertion	1	T	2.3	2	NA	NA	NA	NA	TR	polymerase slippage	INTRON	pbt/hc	F	Drenthe	24	22	NA	0	NA	NA	TTTGGGAAACTAGCTGGGCC	GGGAGATCGCCTGATGTCAG
gonl-64c	13	92196433	92196435	ATT	A	deletion	-2	T	3.1	3	1	NA	NA	NA	NR, CCC	polymerase slippage	INTRON	pbt/ug/hc	F	Zuid_Holland	28	24	NA	0	NA	NA	TCCTGCCTGAATCCCCATTT	ACACGCAGCAAAGCAAAAGT
gonl-64c	20	43158179	43158181	CAG	C	deletion	-2	AG	3.2	6	2	NA	NA	NA	NR, CCC	polymerase slippage	NA	pbt/ug/hc	F	Zuid_Holland	28	24	NA	0	NA	NA	GGCACAGTCTCTGCTGACTT	TAACAACCAGATGGCCCCAC
gonl-65c	20	38721263	38721263	G	GAA	insertion	2	A	1.3	10	NA	NA	NA	NA	TR	polymerase slippage	NA	hc	M	Overijssel	29	26	NA	0	NA	NA	GGGGAACTATGCAGCCAACT	GAAGTGCTGACCCCCTCTTC
gonl-66c	12	8946378	8946380	AAG	A	deletion	-2	AG	3.2	7	2	NA	NA	NA	NR, CCC	polymerase slippage	NA	pbt/ug	M	gelderland	27	26	NA	0	NA	NA	TCTTGCCCCAGGGATCAGTA	ATGTTGCCCAACTCCAGAGG
gonl-6c	4	37288480	37288480	A	AG	insertion	1	NA	NA	NA	NA	NA	NA	NA	NR, non-CCC	NHEJ	INTRON	pbt/ug/hc	M	Noord_Holland	26	24	NA	0	NA	NA	CAACTTGTGTGCACTTGAGC	CACTCTGTGCCTCCCTTG
gonl-6c	8	15336162	15336165	TACC	T	deletion	-3	NA	NA	NA	2	NA	NA	NA	NR, non-CCC	NHEJ	NA	pbt/pindel/ug/hc	M	Noord_Holland	26	24	NA	0	NA	NA	GCCTCTGTGTGTTCATGTG	TGTGGCAATTCCTCAAAGAC
gonl-6c	12	71026361	71026361	A	AG	insertion	1	NA	NA	NA	NA	NA	NA	NA	NR, non-CCC	NHEJ	INTRON	pbt/ug/hc	M	Noord_Holland	26	24	NA	0	NA	NA	GGGCAGGAGACATCACAC	TCCTCTAAGCTGACTAAATGAGG
gonl-74c	3	55913640	55913644	ACATG	A	deletion	-4	NA	NA	NA	3	father	9	0	NR, non-CCC	NHEJ/hairpin loop	INTRON	pbt/pindel/ug/hc	M	Noord_Holland	37	32	NA	6	NA	NA	ATCTGAGGCAGCATGAATC	CTGGGAATCCAGTTCTAAGG
gonl-74c	4	112320712	112320712	C	CT	insertion	1	T	6.7	6	NA	mother	0	4	HR	polymerase slippage	NA	pbt/pindel/ug/hc	M	Noord_Holland	37	32	NA	6	NA	NA	CTCAGCATGTTTTGGGCGTG	AACTAGCTTGTGGGTGGGTG
gonl-74c	7	24296662	24296667	TAATAA	T	deletion	-5	AATAA	2.1	10	5	NA	NA	NA	NR, CCC	polymerase slippage	NA	pbt/pindel/ug/hc	M	Noord_Holland	37	32	NA	0	NA	NA	AGGAGGCTGAGGGAGAATAG	CCCATGGCTCTAATTGTTTC
gonl-74c	8	132842338	132842339	GA	G	deletion	-1	A	4.3	4	1	NA	NA	NA	NR, CCC	polymerase slippage	NA	pbt/pindel/ug/hc	M	Noord_Holland	37	32	NA	0	NA	NA	CACATGTGAGAAATGCCAAC	ATCCTTTCCCGGTTGCTG
gonl-74c	9	6674191	6674192	GA	G	deletion	-1	NA	NA	NA	0	father	9	0	NR, non-CCC	NHEJ	NA	pbt/pindel/ug/hc	M	Noord_Holland	37	32	NA	0	NA	NA	CCCACACTCCCAGGATCCTA	TTTGAGACTAGGCTGCGCAA
gonl-74c	17	3349197	3349200	AAAC	A	deletion	-3	AAC	2.1	7	3	NA	NA	NA	NR, CCC	polymerase slippage	INTRON	pbt/ug/hc	M	Noord_Holland	37	32	NA	0	NA	NA	CTGAACAAAACCAGCCCAGC	AGATGCTACCTTGCTGGCTT
gonl-78c	5	14276769	14276771	CAA	C	deletion	-2	NA	NA	NA	0	NA	NA	NA	NR, non-CCC	NHEJ	INTRON	pbt/pindel/ug/hc	M	Zeeland	29	26	NA	0	NA	NA	GCAAGAGGTGAGCCTAGAAG	TTGGTCTCTTGAGCAATGTG
gonl-78c	9	81711991	81711992	CT	C	deletion	-1	NA	NA	NA	0	NA	NA	NA	NR, non-CCC	NHEJ	NA	pbt/ug/hc	M	Zeeland	29	26	NA	0	NA	NA	TGCATCATTGATCTTCTATCTAGTC	CTCCATGACACAAGTTCACC
gonl-78c	13	40217969	40217969	G	GT	insertion	1	T	6.7	6	NA	mother	0	7	HR	polymerase slippage	NA	pbt/ug/hc	M	Zeeland	29	26	NA	0	NA	NA	TCCAAGTACAAGATATTCAACACC	TTTCAGGTACATTCTTAAACAGG
gonl-7c	1	106099228	106099229	TA	T	deletion	-1	A	4.3	4	1	NA	NA	NA	NR, CCC	polymerase slippage	NA	pbt	F	Overijssel	31	30	NA	0	NA	NA	TCACTACCTCCCTACAGCCT	TTCATTCCCAAAGGCCAGCT
gonl-7c	5	6779396	6779397	CT	C	deletion	-1	T	2.1	2	1	father	4	0	NR, CCC	polymerase slippage	NA	pbt/pindel/ug/hc	F	Overijssel	31	30	NA	0	NA	NA	TTTGTTATACCAGCCCAAACGGA	CAATGTCATTCAAATGGGGAGCC
gonl-7c	5	138236182	138236183	AAGGA	AGGG	complex	-1	NA	NA	NA	NA	NA	NA	NA	Complex	SD-MMEJ/TMEJ	INTRON	NA	F	Overijssel	31	30	NA	0	NA	NA	TCTTGTCTTCCTACAAACATTCCA	TGACTTTATTTCAATCCTGCTCCTT
gonl-7c	15	35335906	35335906	G	GTAAAA	insertion	5	TAAAA	1.2	5	NA	father	14	0	NR, CCC	polymerase slippage	NA	pbt/ug/hc	F	Overijssel	31	30	NA	0	NA	NA	GCCCGCTCTTCCTCCTATTT	GTTCCCTGGAGACCTGATGG
gonl-7d	3	104956495	104956496	GT	G	deletion	-1	T	2.1	2	1	NA	NA	NA	NR, CCC	polymerase slippage	NA	pindel/ug/hc	F	Overijssel	31	30	NA	0	NA	NA	TCTGTGTAATGAGGATATACACCAAAA	TGAGAATCAGTTCGGAAGAAACT
gonl-7d	4	40866725	40866725	C	CT	insertion	1	T	1.2	1	NA	NA	NA	NA	NR, CCC	polymerase slippage	INTRON	pindel/ug/hc	F	Overijssel	31	30	NA	0	NA	NA	CAGGCAGCATAGCTCATTTTCTT	ATTTATGCTCACCCTCGCTACAC
gonl-7d	4	77982177	77982183	GTTGGGA	G	deletion	-6	NA	NA	NA	2	father	3	0	NR, non-CCC	NHEJ/hairpin loop	INTRON	ug/hc	F	Overijssel	31	30	NA	6	NA	NA	CCCACCTCAGCATCCTGAAG	AGGAGAAGACTAGCAGCATGTG
gonl-7d	14	102443472	102443473	CT	C	deletion	-1	T	5.4	5	1	NA	NA	NA	NR, CCC	polymerase slippage	INTRON	ug/hc	F	Overijssel	31	30	NA	0	NA	NA	CAGGTTACAGTCAGCCCTCG	ACGCAACTCTTCCGTAACCT
gonl-7d	15	74816509	74816510	TC	T	deletion	-1	NA	NA	NA	0	NA	NA	NA	NR, non-CCC	NHEJ	NA	ug/hc	F	Overijssel	31	30	NA	0	NA	NA	AACCATGAGAAACCACCCCC	ACCCTACAAGGCTCCATTGC
gonl-80c	3	58396237	58396238	CT	C	deletion	-1	T	2.1	2	1	father	5	0	NR, CCC	polymerase slippage	INTRON	pbt/pindel/ug	F	Groningen	30	27	NA	0	NA	NA	TTGCAACAGTATTCGTAGGC	GCTCTGATTTCCAAAGATGG
gonl-80c	3	141730836	141730837	CT	C	deletion	-1	T	8.7	8	1	NA	NA	NA	HR	polymerase slippage	INTRON	pbt/ug/hc	F	Groningen	30	27	NA	0	NA	NA	GGCTAAGCATTAGGATATTCAG	CTGGCTAACACAGTGAAACC
gonl-80c	7	72108175	72108179	CAAAA	C	deletion	-4	NA	NA	NA	0	NA	NA	NA	NR, non-CCC	NHEJ	INTRON	pbt/ug/hc	F	Groningen	30	27	NA	0	NA	NA	TATAACACGCGCTAACTTGG	CTCCTGACCTTAGGTGATCC
gonl-80c	12	101263208	101263212	TAGAC	T	deletion	-4	NA	NA	NA	2	father	1	0	NR, non-CCC	NHEJ	NA	pbt/pindel/ug/hc	F	Groningen	30	27	NA	0	NA	NA	CCTGCCAATATAGACTGGTG	GATATGGCTGAGGACAAAGC
gonl-81c	2	25193798	25193804	AGGCACT	A	deletion	-6	NA	NA	NA	1	father	1	0	NR, non-CCC	NHEJ	INTRON	pbt/ug	F	gelderland	30	31	NA	0	NA	NA	AGCTAGCGTGCCCAGTC	CCCTTATGAATTCCAAGACG
gonl-81c	4	19053434	19053436	CTA	C	deletion	-2	NA	NA	NA	1	NA	NA	NA	NR, non-CCC	NHEJ	NA	pbt/pindel/ug/hc	F	gelderland	30	31	NA	0	NA	NA	AGACCAAATCTCCTTAACATCC	AGTAGGATGCAAGCTGCTG
gonl-81c	5	35408897	35408904	ATTGAGAC	A	deletion	-7	NA	NA	NA	4	NA	NA	NA	NR, non-CCC	NHEJ/MMEJ/Replication slippage	NA	pbt/pindel/ug/hc	F	gelderland	30	31	NA	0	NA	NA	GCAGAGCTTGGCATGTAAC	TCACCAATCCAAAGAGAGTG
gonl-81c	9	140483521	140483527	AGGGGCC	A	deletion	-6	NA	NA	NA	5	father	2	0	NR, non-CCC	NHEJ/MMEJ/Replication slippage	INTRON	pbt/ug/hc	F	gelderland	30	31	NA	0	NA	NA	GGTGGTGCAGTCTACGACAA	CTCTCCAGTCAGGTCGGAGA
gonl-82c	2	80851777	80851777	A	AT	insertion	1	T	8.9	8	NA	NA	NA	NA	HR	polymerase slippage	INTRON	pbt/ug/hc	F	Limburg	31	26	NA	0	NA	NA	ACCGAACTTTCATGCCCATG	GTTGCTGTTCTCTGCTTGGC
gonl-82c	3	12053350	12053353	CATT	C	deletion	-3	NA	NA	NA	2	NA	NA	NA	NR, non-CCC	NHEJ	NA	pbt/ug/hc	F	Limburg	31	26	NA	0	NA	NA	CAGTCACCCTGCCCTTCTTT	AGATACCTGCGGCTGGAAAC
gonl-82c	5	143735817	143735819	ATC	A	deletion	-2	TC	3.2	7	2	NA	NA	NA	NR, CCC	polymerase slippage	INTRON	pbt/ug/hc	F	Limburg	31	26	NA	0	NA	NA	TGTTAAGCCAGGGCCATGTT	GGACCCCTTCTTCCAATGGG
gonl-87c	X	67532945	67532945	C	CAAAT	insertion	4	AAAT	5.6	22	NA	NA	NA	NA	TR	polymerase slippage	INTRON	pindel	M	Zuid_Holland	41	38	NA	0	NA	NA	TAGCTGGGTGTGGTGGTACA	CAGGATCATACGGCAGCTCA
gonl-88c	5	73329721	73329722	AAA	AT	complex	-1	NA	NA	NA	NA	NA	NA	NA	Complex	NA	NA	NA	F	Zeeland	26	25	6	0	NA	NA	GCCAGCGTTAGTGAAGGACT	GCCTCCTGAATGCCCTTCAT
gonl-8c	3	100404209	100404213	CTTTT	C	deletion	-4	T	9.5	9	4	NA	NA	NA	HR	polymerase slippage	INTRON	pbt/hc	M	gelderland	26	22	NA	0	NA	NA	GCTTCTTGCAGTTTTGTTGGT	ACGACTTAATGGGTGCAGCA
gonl-8c	4	97650950	97650950	A	AT	insertion	1	T	3.4	3	NA	NA	NA	NA	NR, CCC	polymerase slippage	NA	pbt/pindel/ug/hc	M	gelderland	26	22	NA	0	NA	NA	CAAAGGTCAGCAGTGGCAACAAT	AACTGCCAGCAGGAAAAGAAAAC
gonl-8c	4	103659820	103659824	AAAGT	A	deletion	-4	NA	NA	NA	2	NA	NA	NA	NR, non-CCC	NHEJ	INTRON	pbt/pindel/ug/hc	M	gelderland	26	22	NA	0	NA	NA	ACCCTTGAGTTCCAAATCTTTCCA	ACCCGATAATCAACCTTCTGAATTG
gonl-8c	13	49677412	49677417	TAATAA	T	deletion	-5	NA	NA	NA	3	NA	NA	NA	NR, non-CCC	NHEJ	INTRON	pbt/pindel/ug/hc	M	gelderland	26	22	NA	0	NA	NA	AGCTGAGTCCATGTTCTTCATCA	GGTGATGCCACTCAAACTGGTAA
gonl-8c	18	3825081	3825085	CACAA	C	deletion	-4	NA	NA	NA	3	NA	NA	NA	NR, non-CCC	NHEJ	INTRON	pbt/ug/hc	M	gelderland	26	22	NA	0	NA	NA	ATTCCCACTGCATCTTGGGG	GAAGTGATGTGCAGGCATTGT
gonl-8c	22	19235012	19235015	CATG	C	deletion	-3	ATG	2.1	8	3	NA	NA	NA	NR, CCC	polymerase slippage	INTRON	pbt/pindel/ug/hc	M	gelderland	26	22	NA	0	NA	NA	CCCATGAGGTGTTTTGTTGTTGG	AACTCTTGGGAATTATGCCTCTT
gonl-91c	3	43390907	43390909	AACT	AC	complex	-2	NA	NA	NA	0	NA	NA	NA	Complex	NA	NA	NA	M	Noord_Brabant	28	26	NA	0	NA	NA	AAAACAAAGTTTGGGCTCTG	TTTTGTTTGCTGTATGTGTG
gonl-91c	4	95891235	95891236	TC	T	deletion	-1	NA	NA	NA	0	father	3	0	NR, non-CCC	NHEJ	NA	pbt/hc	M	Noord_Brabant	28	26	NA	NA	NA	NA	TGCCTAAGAAGTATTTGTAGATGG	CAGAGAGTGAAACTCCGAAAG
gonl-91c	7	140423712	140423713	AT	A	deletion	-1	NA	NA	NA	0	NA	NA	NA	NR, non-CCC	NHEJ	NA	pbt/ug/hc	M	Noord_Brabant	28	26	NA	0	NA	NA	TTCAGAAGGCTTCACCTCTC	GCTGGTATCTCATTTGAACG
gonl-91c	10	111917578	111917578	A	ACT	insertion	2	CT	5.6	10	NA	NA	NA	NA	TR	polymerase slippage	NA	pbt/ug	M	Noord_Brabant	28	26	NA	0	NA	NA	TTGGTGCACGCCTGTAG	AATCCCACAGCAAATCAGTC
gonl-95c	3	113635034	113635035	CA	C	deletion	-1	A	4.3	4	1	NA	NA	NA	NR, CCC	polymerase slippage	INTRON	pbt/ug/hc	F	Noord_Brabant	43	44	NA	0	NA	NA	TGCTCTTTACCAGTTCACGCT	AGCATCCCAAAAGCTCCCTC
gonl-95c	7	155210147	155210147	A	ATCTC	insertion	4	TC	4.6	9	NA	mother	0	5	TR	polymerase slippage	NA	pbt/ug/hc	F	Noord_Brabant	43	44	NA	0	NA	NA	GCTGTGCAGATCCTTCCCTT	GTCAGACATCCCACTCACGG
gonl-95c	22	30053863	30053864	AC	A	deletion	-1	NA	NA	NA	0	NA	NA	NA	NR, non-CCC	NHEJ	INTRON	pbt/ug/hc	F	Noord_Brabant	43	44	NA	0	NA	NA	ACACTTGGCGTTCTCTCAGG	CAAAAGCCACAGCAGACACC
gonl-96c	3	39800508	39800512	ATTTG	A	deletion	-4	TTTG	2.1	8	4	NA	NA	NA	NR, CCC	polymerase slippage	NA	pbt/pindel/ug/hc	F	Utrecht	31	30	NA	0	NA	NA	TCAAGATGGTCAAGATGGGAGAT	GATGGTCACAGTGGCTAAGCAG
gonl-96c	9	103982036	103982037	AG	A	deletion	-1	NA	NA	NA	0	NA	NA	NA	NR, non-CCC	NHEJ	INTRON	pbt/pindel/ug/hc	F	Utrecht	31	30	NA	0	NA	NA	TATGTCTTGCTCCATACCCACCT	CTGCCAAGGCTATGAGCATTCTA
gonl-97c	7	3565446	3565447	AT	A	deletion	-1	NA	NA	NA	0	NA	NA	NA	NR, non-CCC	NHEJ	INTRON	pbt/pindel/ug/hc	F	Noord_Holland	33	29	NA	0	NA	NA	TTAGGTCGGGTTAATTCCTG	GTCTCAAACTCCCGACCTC
gonl-97c	8	29915721	29915721	G	GT	insertion	1	T	1.2	2	NA	NA	NA	NA	NR, CCC	polymerase slippage	NA	pbt/ug/hc	F	Noord_Holland	33	29	NA	0	NA	NA	TTGCAATTGAAGTCACCATC	ATGAGGAAATTTGGACACAG
gonl-97c	13	73632614	73632615	GC	G	deletion	-1	C	4.3	4	1	NA	NA	NA	NR, CCC	polymerase slippage	NA	pbt/ug/hc	F	Noord_Holland	33	29	NA	0	NA	NA	ACGGATGGGAAGTAGAAATG	TCTCTTCGCACTGTTCTCTG
gonl-97c	16	55981951	55981952	AT	A	deletion	-1	T	2.1	2	1	NA	NA	NA	NR, CCC	polymerase slippage	INTRON	pbt/pindel/ug/hc	F	Noord_Holland	33	29	NA	0	NA	NA	AGGGCCAGGTCATAAACAG	GAGTGCTAATCAAAGCCTCAG
