# Supplementary material for: Characteristics of de novo structural changes in the human genome
Source: HighWire-hosted journal article supplement (doi:10.1101/gr.185041.114), 2015-04-16
Supplement: Supplemental_Table_4.xlsx [file Supplemental_Table_4.xlsx]

## Sheet: Sheet1
Supplemental Table 4. Formation mechanisms for large SVs identified in GoNL and other studiesa.
mechanism	GoNL de novo	GoNL inherited	Mills et al. (2011)b	Pang et al. (2013)	Kidd et al. (2010)
NHR	24 (58.54%)	11797 (30.3%)	4579 (32%)	572834 (72.51%)	549 (52.09%)
NAHR	8 (19.51%)	7153 (18.4%)	1722 (12%)	2050 (0.26%)	275 (26.09%)
VNTR	3 (7.32%)	4074 (10.5%)	367 (2.6%)	213566 (27.03%)	30 (2.85%)
MEI	6 (14.63%)	15847 (40.8%)	7637 (53.4%)	1542 (0.20%)	200 (18.98%)
aProportions represent the total of SVs reported in each study and have not been stratified by SV class
bNumbers include all MEIs reported in this study (2266 MEIs detected based on deletions ancestral allele and 5371 MEIs called separately)
