# Supplementary material for: Characteristics of de novo structural changes in the human genome
Source: HighWire-hosted journal article supplement (doi:10.1101/gr.185041.114), 2015-04-16
Supplement: Supplemental_Table_5.xlsx [file Supplemental_Table_5.xlsx]

## Sheet: Sheet1
Supplemental Table 5. Histone modification datasets used for functional assessment of de novo variants.
Cell Type	H3K4Me3	H3KMe1	H3K27ac
Dnd41	GSM1003468	GSM1003460	GSM1003462
GM12878	GSM733708	GSM733772	GSM733771
H1-hESC	GSM733657	GSM733782	GSM733718
HMEC	GSM733712	GSM733705	GSM733660
HSMM	GSM733637	GSM733761	GSM733755
HSMMtube	GSM733738	GSM733661	GSM733666
HUVEC	GSM733673	GSM733690	GSM733691
HeLa-S3	GSM733682	GSM798322	GSM733684
HepG2	GSM733737	GSM798321	GSM733743
K562	GSM733680	GSM733692	GSM733656
Monocytes CD14+ RO01746	GSM1003536	GSM1003535	GSM1003559
NH-A	GSM733747	GSM733710	GSM733763
NHDF-Ad	GSM733650	GSM1003526	GSM733662
NHEK	GSM733720	GSM733698	GSM733674
NHLF	GSM733723	GSM733649	GSM733646
Osteoblasts	GSM1003506	GSM733704	GSM733739
